1 **PIWI silencing mechanism involving the retrotransposon *nimbus* orchestrates resistance to**  
2 **infection with *Schistosoma mansoni* in the snail vector, *Biomphalaria glabrata***

3  
4 Michael Smith<sup>2</sup>, Swara Yadav<sup>1</sup>, Olayemi Akinyele<sup>1</sup>, Nana Adjoa Pels<sup>1</sup>, Daniel Horton<sup>3</sup>, Nashwah  
5 Alsultan<sup>1</sup>, Andrea Borns<sup>1</sup>, Carolyn Cousin<sup>1</sup>, Freddie Dixon<sup>1</sup>, Victoria H. Mann<sup>4</sup>, Clarence Lee,  
6 Paul J. Brindley<sup>4</sup>, Najib M. El-Sayed<sup>5</sup>, Joanna M. Bridger<sup>3</sup> and Matty Knight<sup>1,4</sup>

7  
8 1. Division of Science & Mathematics, University of the District of Columbia, 4200 Connecticut  
9 Ave. NW Washington, D.C. 20008, USA

10 2. Howard University 2400 Sixth St NW, Washington, DC 20059, USA

11 3. Centre for Genome Engineering and Maintenance, Division of Biosciences, Department of  
12 Life Sciences, College of Health, Medicine and Life Sciences, Brunel University London,  
13 Uxbridge, UK

14 4. Department of Microbiology, Immunology & Tropical Medicine, Research Center for  
15 Neglected Diseases of Poverty, School of Medicine & Health Sciences, The George Washington  
16 University Ross Hall, 2300 I Street, NW, Washington, DC 20037, USA

17 5. Department of Cell Biology and Molecular Genetics and Center for Bioinformatics and  
18 Computational Biology, University of Maryland, College Park, Maryland 20742, USA

19

20

21

22

23

24

## 25 **ABSTRACT**

### 26 **Background**

27 Schistosomiasis remains widespread in many regions despite efforts at its elimination. By  
28 examining changes in the transcriptome at the host-pathogen interface in the snail *Biomphalaria*  
29 *glabrata* and the blood fluke *Schistosoma mansoni*, we previously demonstrated that an early  
30 stress response in juvenile snails, manifested by induction of heat shock protein 70 (Hsp 70) and  
31 Hsp 90 and of the reverse transcriptase (RT) domain of the *B. glabrata* non-LTR-  
32 retrotransposon, *nimbus*, were critical for *B. glabrata* susceptibility to *S. mansoni*. Subsequently,  
33 juvenile *B. glabrata* BS90 snails, resistant to *S. mansoni* at 25°C become susceptible by the F2  
34 generation when maintained at 32°C, indicating an epigenetic response.

### 35 **Methodology/Principal Findings**

36 To better understand this plasticity in susceptibility of the BS90 snail, mRNA sequences were  
37 examined from *S. mansoni* exposed juvenile BS90 snails cultured either at 25°C (permissive  
38 temperature) or 32°C (non-permissive). Comparative analysis of transcriptomes from snails  
39 cultured at the non-permissive and permissive temperatures revealed that whereas stress related  
40 transcripts dominated the transcriptome of susceptible BS90 juvenile snails at 32°C, transcripts  
41 encoding proteins with a role in epigenetics, such as PIWI (*BgPiwi*), chromobox protein  
42 homolog 1 (*BgCBx1*), histone acetyl transferase histone deacetylase (HDAC) and  
43 metallotransferase (MT) were highly expressed in those cultured at 25°C. To further determine a  
44 role for *BgPiwi* in *B. glabrata* susceptibility to *S. mansoni*, siRNA corresponding to the *BgPiwi*  
45 encoding transcript was utilized to suppress expression of *BgPiwi*, rendering the resistant BS90  
46 juvenile snail susceptible to infection at 25°C. Given transposon silencing activity of PIWI as a

47 facet of its role as guardian of the integrity of the genome, we examined the expression of the  
48 *nimbus* RT encoding transcript at 120 min after infection of resistant BS90 *piwi*-siRNA treated  
49 snails. We observed that *nimbus* RT was upregulated, indicating that modulation of the  
50 transcription of the *nimbus* RT was associated with susceptibility to *S. mansoni* in *BgPiwi*-  
51 siRNA treated BS90 snails. Furthermore, treatment of susceptible snails with the RT inhibitor  
52 lamivudine, before exposure to *S. mansoni*, blocked *S. mansoni* infection concurrent with  
53 downregulation of the *nimbus* RT transcript and upregulation of the *BgPiwi* encoding transcript  
54 in the lamivudine-treated, schistosome-exposed susceptible snails.

### 55 **Conclusions and Significance**

56 These findings support a role for the interplay of *BgPiwi* and *nimbus* in the epigenetic  
57 modulation of plasticity of resistance/susceptibility in the snail-schistosome relationship.

58

59 **KEYWORDS:** *Biomphalaria glabrata*, *Schistosoma mansoni*, Schistosomiasis,  
60 resistance, susceptibility, plasticity, epigenetics, *Bg-piwi*, gene- silencing, *nimbus*,  
61 reverse transcriptase, Lamivudine

62 Corresponding author: email; [mathilde.knight@udc.edu](mailto:mathilde.knight@udc.edu); [matty\\_knight@email.gwu.edu](mailto:matty_knight@email.gwu.edu) phone  
63 office; 202- 274-5887: Lab; 202-274-6486

64

65

66

67

68

69

## 70 INTRODUCTION

71

72 The freshwater snail, *Biomphalaria glabrata*, is an obligate intermediate host of the  
73 trematode, *Schistosoma mansoni*, the causative agent of the neglected tropical disease  
74 (NTD) schistosomiasis in neotropical regions. At least 600 million people, mainly in sub-  
75 Saharan Africa, are at risk for schistosomiasis, a number that remains excessively high,  
76 despite efforts to control transmission of the disease [1]. This disease causes widespread  
77 chronic morbidity and male and female infertility. Specifically, infections caused by the  
78 species, *Schistosoma haematobium* may result in bladder cancer and female genital  
79 schistosomiasis. The latter exacerbates transmission of sexually transmitted diseases  
80 including HIV (AIDS) [2].

81

82 The disease burden from schistosomiasis is probably underestimated, and it has been  
83 suggested that the number of infected individuals exceeds 400 million [3]. On the other  
84 hand, there are other estimations that claim 230 million people worldwide are infected  
85 with *S. mansoni* [1]. These numbers are often underestimated due to the inability of  
86 current diagnostic methods to detect light infections [4]. There are few defenses against  
87 schistosomiasis, mainly because the residents of infected areas lack sufficient  
88 infrastructure to properly combat this disease [3]. An integrated control approach,  
89 implementing mass chemotherapy and molluscicides has made a difference in breaking  
90 the complex life cycle of the parasite but without new effective drugs and vaccines to  
91 prevent re-infection in treated areas, the cycle of repeated infection is the norm, thereby  
92 making the long- term control of schistosomiasis elusive [5, 6]. Because of recent

93 projections made by the World Health Organization to eliminate schistosomiasis by 2025  
94 and coupled with recent concerns of the spread of the disease into Mediterranean  
95 countries of Europe, alternative approaches focusing mainly on blocking the development  
96 of the parasite in the snail host are aggressively sought [7-9].

97  
98 Molecular mechanism(s) involved in shaping the relationship between the parasite and its  
99 obligate intermediate snail host, *Biomphalaria glabrata*, remains largely unknown. However,  
100 information that will assist in clarifying some of the mechanisms of host/parasite interactions is  
101 steadily being amassed. Reference genome sequences for all three organisms (human,  
102 schistosome and snail) pertinent to transmission of schistosomiasis are now available [10-12].  
103 Additionally, genes that underlie resistance and susceptibility phenotypes in *B. glabrata* to *S.*  
104 *mansoni* infection are being identified [13-15], as are transcripts encoding larval (miracidia)  
105 parasite proteins that are expressed at the snail/parasite interphase [16, 17]. Both snail and  
106 parasite determinants are involved in a complex and dynamic innate defence system that either  
107 rejects or sustains the successful development of the intra-molluscan stages of the parasite [13,  
108 15].

109  
110 Previously, we demonstrated that juvenile *B. glabrata*, that are either resistant or  
111 susceptible to *S. mansoni*, display a differential stress response after early exposure to  
112 wild type but not to irradiated *S. mansoni* miracidia. The stress response observed in the  
113 susceptible juvenile snail was manifested by the early induction of transcripts encoding  
114 heat shock proteins (Hsp) 70, Hsp90 and the reverse transcriptase (RT) domain of the *B.*  
115 *glabrata* non-LTR-retrotransposon, *nimbus* [18]. Furthermore, the non-random

116 relocalization of the Hsp70 gene loci in interphase nuclei preceded transcription of the  
117 corresponding Hsp70 transcript in the susceptible but not in the resistant snail, indicating  
118 that in-coming schistosomes possess the ability to orchestrate in a rapid and systemic  
119 fashion, the genome remodeling of juvenile susceptible snails soon after infection [19].  
120 We also demonstrated that resistance in the juvenile BS90 snail stock was a temperature  
121 dependent trait. Thus, when cultured at room temperature (25°C), juvenile BS90 snails  
122 remained consistently resistant to infection. However, when cultured at 32°C for several  
123 generations (F<sub>1</sub> to F<sub>3</sub>), the progeny juvenile snails were phenotypically susceptible [20],  
124 indicating a plastic epigenetic control over resistance.

125

126 Other studies that have used adult (>7 mm in diameter) snails instead of juveniles have  
127 suggested that ability to alter the resistance of the BS90 to infection at elevated  
128 temperature might be a strain-specific trait [21]. In recent studies, resistant BS90 snails  
129 were found to be susceptible when exposed to *S. mansoni* as neonates [22]. In general,  
130 adult snails are less susceptible to infection [23]. Furthermore, in some stocks of *B.*  
131 *glabrata*, for example the 93375 strain, the juveniles are susceptible but become resistant  
132 to the same strain of *S. mansoni* as young adults (at the onset of fecundity), and once egg  
133 laying ceases and amoebocyte accumulations disappear in the pericardial wall, revert to  
134 the susceptible phenotype [23, 24].

135

136 To further investigate the molecular basis of susceptibility plasticity, notably in the BS90 snail,  
137 we have undertaken a comparative analysis of the transcriptomes of juvenile BS90 snails  
138 cultured for several generations at either permissive (32°C) or non-permissive (25°C), aiming to

139 obtain leads for pathway(s) that lead either to resistance or susceptibility. This investigation and  
140 the findings are detailed below.

141

## 142 **MATERIALS & METHODS**

### 143 **Snails**

144 The BS-90 snail is a wild-type pigmented snail that is resistant to *S. mansoni* (NMRI  
145 strain) either as a juvenile or as an adult snail at 25°C [25]. The NMRI snail is an albino  
146 susceptible snail that was derived from a cross between the wild type Puerto Rican snail  
147 and a highly susceptible Brazilian albino snail [26, 27]. The BB02 snail is a susceptible  
148 pigmented wild type snail from Brazil whose genomic DNA sequence was recently  
149 reported [10]. The susceptible snails (NMRI and BBO2) are highly susceptible as  
150 juveniles but the degree of susceptibility, especially in the NMRI stock, is variable as an  
151 adult snail [28].

152

### 153 **Snail husbandry and *S. mansoni* infections**

154 BS90 stocks were cultured at 32°C as described [20]. Exposure of BS90 snails cultured at  
155 32°C to miracidia were performed using juvenile progeny, F<sub>1</sub>- F<sub>2</sub>, <4 mm in diameter that  
156 were bred at the elevated temperature. Briefly, BS90 snails were cultured either at 25°C  
157 or 32°C in freshly made artificial pond water ([www.afbr-bri.com](http://www.afbr-bri.com)) and fed *ad libitum*  
158 with either romaine lettuce or snail gel food [29]. Juvenile snails or egg clutches were  
159 transferred from 25°C to 32°C and maintained in groups of 3 or 4 in fresh water (100 ml)  
160 in beakers maintained in a water bath at 32°C. The temperature inside the water bath was  
161 monitored daily to maintain 32°C for the duration of the experiment. The snails were

162 cleaned weekly making sure that pre-warmed (32°C) water was used to clean the snails.  
163 Detritus including dead snails and decayed lettuce leaves were removed daily. The egg  
164 clutches from these snails (produced at 32°C) were collected and their progeny were  
165 maintained at 32°C until they had grown to 3 to 4 mm in diameter (juvenile snails) before  
166 exposure to miracidia at 25°C. The juvenile BS90 snails, 3 to 4 mm in diameter, were  
167 maintained for two generations at either 32°C or 25°C and RNA prepared from 0 and  
168 two-hour infected F<sub>2</sub> progeny as described [20]. Snails were exposed individually to the  
169 10 to 12 miracidia in wells of a 12-well tissue culture plate (Greiner Bio-One, North  
170 Carolina, USA) at room temperature. Miracidia were hatched from eggs recovered from  
171 the livers of mice which had been infected with *S. mansoni* (NMRI strain) for seven  
172 weeks [30].

173  
174 Exposed snails (not used for RNA) were maintained at 25°C and examined for cercarial  
175 shedding from four to 10 weeks later. Susceptible BBO2 and NMRI *B. glabrata* snails  
176 utilized in this study were exposed as juveniles (described above) to freshly hatched  
177 miracidia. To determine patency (cercarial shedding), individual snails were immersed in  
178 one ml nuclease-free water in 12-well plates and directly exposed to a light source for 30  
179 to 60 minutes at room temperature, after which snails were removed from the wells.  
180 Cercariae released from individual snails were counted after adding a few drops of  
181 Lugol's iodine solution to each well. After shedding, snails that were patent were  
182 euthanized by immersion in 95% ethanol; non-shedding snails were incubated for up to  
183 10 weeks at 25°C and checked weekly for patency.

184



## 185 **RNA sequencing, assembly, and annotation**

186 Total RNA was isolated by RNazol (Molecular Research Center, Inc. Cincinnati, OH)  
187 from resistant (25°C) and susceptible (32°C) BS90 snails. BS90 snail transcriptome was  
188 generated from polyA<sup>+</sup> RNA isolated from pooled intact 2 hour exposed juvenile snails  
189 maintained either at the non-permissive temperature (25°C), or at the permissive  
190 temperature (32°C) on an Illumina HiSeq 100. Following RNAseq Illumina sequencing,  
191 *de novo* assembly of the transcriptome was performed using Trinity. Functional  
192 annotation of the contigs was performed with Trinotate that included Gene Ontology  
193 assignments when possible, pFAM domain identification, transmembrane region  
194 predictions (TmHMM) and signal peptide predictions (signalP). Differential expression  
195 (DE) analyses were performed by using DESeq and identified differentially expressed  
196 contigs between BS90 snails from the different categories. The analyses of these contigs  
197 revealed the presence of known specific genes coding for several stress related and other  
198 transcripts (Table 1). The complete transcriptome profiles of changes observed in  
199 schistosome juvenile BS90 snails at either permissive (32°C) or non-permissive (25°C)  
200 are provided as FASTQ files in the SRA database within NCBI with Bioproject ID  
201 PRJNA687288.

202

## 203 **Two step qPCR**

204 Differential expression of the selected transcripts identified from the single pass RNAseq dataset  
205 generated from resistant (25°C) and susceptible (32°C) juvenile BS90 snails were further  
206 validated in other representative BS90 and susceptible snail stocks NMRI and BBO2 that were  
207 either unexposed (0 hour) or exposed to *S. mansoni* for 30 min, 1, 2, 4 and 16 hours at 25°C.

208 cDNA was prepared from total RNA as described and contaminating genomic DNA removed by  
209 treatment of the RNAs with DNase (RQI Promega WI) before performing the RT qPCR assays  
210 (Ittiprasert, 2012 #7020). Quantitative real time PCR was performed with forward and reverse  
211 gene specific primers corresponding to selected transcripts normalized against the expression of  
212 the myoglobin gene as a reference, as described [31]. Oligonucleotide primers (forward and  
213 reverse, Table 1) for transcripts identified by sequencing RNA of BS90 snails at either  
214 permissive (32°C) or non-permissive temperatures (25°C) were designed from amino acid  
215 sequences corresponding to the coding DNA sequence (CDS) of the following transcripts: piwi  
216 like protein (*BgPiwi*), chromobox protein homolog 1 (*BgCBx1*), methyltransferase (*BgMT*),  
217 Histone Acetyl Transferase (*BgHAT*) and histone deacetylase (*BgHDAC*). These CDS were  
218 utilized to interrogate the reference *B. glabrata* genome sequences in GenBank by using the  
219 Basic Local Alignment Search Tool, BLAST in NCBI. A standard BLASTp was performed to  
220 further validate annotations of the selected transcripts followed by a SMART BLAST to explore  
221 the phylogeny of the *B. glabrata* orthologs to other transcripts in the public domain. Amino acid  
222 sequences of *B. glabrata* CDS showing significant (E value =  $< 10^{-4}$  and with  $> 25\%$  amino acid  
223 sequence identity) homology to other transcripts were converted to the nucleotide sequences and  
224 gene specific primers were designed using primer BLAST. Forward and reverse primers for  
225 qPCR analysis were obtained from Eurofins Genomics (Louisville, KY) after the exclusion of  
226 sequences for *S. mansoni* to avoid any possible amplification of parasite RNA during Real Time  
227 PCR analysis. Two-step RT qPCR was utilized to quantitatively assess expression of the  
228 selected transcripts using 500 ng of cDNA as template. SYBR Green PCR Master Mix kit  
229 (Applied Bio systems, Thermo Fisher Scientific, Wolston Warrington, UK), with 15  $\mu$ M of  
230 forward and reverse primers were used to evaluate the temporal expression of PIWI, Chromobox

231 protein homolog 1, HDAC, HAT and methyl transferase (MT). Each sample was run in triplicate  
232 and reactions normalized against the constitutively expressed myoglobin reference gene in a  
233 7300-thermal cycler (Applied Biosystems). Relative quantitative expression of the genes of  
234 interest between resistant and susceptible snails was evaluated by the  $\Delta\Delta C_t$  method. The  
235 resulting fold change in expression of the genes of interest normalized against the signal for  
236 myoglobin were calculated by using the formula,  
237 
$$\text{Fold difference} = 2^{-\Delta\Delta C_t} = 2^{-[(C_{t_{\text{gene, test}}} - C_{t_{\text{myoglobin, test}}}) - (C_{t_{\text{gene, control}}} - C_{t_{\text{myoglobin, control}}})]}$$
 [32]. Differences  
238 were assessed using Student's *t* test, Welch's *t* test and 2-way analysis of variance (ANOVA)  
239 wherever relevant by comparing the differential expression (delta-Ct value) of the transcripts  
240 among treatment and control groups. A *p*-value of <0.05 was considered to be statistically  
241 significant, with level of significance denoted as follows, \*\*\*\*,  $p \leq 0.0001$ , \*\*\*,  $p \leq 0.001$ , \*\*,  $p$   
242  $\leq 0.01$ , \*,  $p \leq 0.05$ , and ns,  $p > 0.05$

243

#### 244 ***BgPIWI* transcript silencing by dsRNA and siRNA**

245 To investigate the functional role of *Bgpiwi* expression in *B. glabrata* susceptibility to  
246 schistosome infection, the transcription of *Bgpiwi* was silenced by soaking juvenile BS90 snails  
247 in either dsRNA-, or siRNA- PEI complexes [33]. Double-stranded (ds)RNA corresponding to  
248 *Bgpiwi* was synthesized by using an *in vitro* transcription kit with a purified *Bgpiwi* PCR product  
249 containing T7 sequences (sense and antisense) as template according to the manufacturer's  
250 instructions (MEGAscriptT7, ThermoFisher Scientific Inc.) [34]. Off-target silencing of the  
251 transcript encoding *Bgpiwi* in the resistant BS90 snail was evaluated by soaking snails in parallel  
252 in universal mock siRNA- PEI complexes as control (MISSION siRNA Universal negative  
253 control#1, Sigma Aldrich, St. Louis, MO). Knock-down of the *Bgpiwi* transcript in the resistant

254 BS90 snail (cultured at 25°C) was done as follows: juvenile snails were placed in 1.0 ml  
255 nuclease-free dH<sub>2</sub>O containing either 300 ng dsRNA: 1.0 µg PEI nanoparticle complexes or 775  
256 ng siRNA: 1.0 µg PEI nanoparticle complexes. The complexes were prepared as follows: in a 1.5  
257 ml capacity microcentrifuge tube, 1 µg of PEI, branched with average molecular weight 25000,  
258 (Sigma Aldrich) in 500 µl nuclease-free H<sub>2</sub>O was added slowly, drop-wise, to two different  
259 siRNAs (Sigma Millipore) (start on target sequence CDS position 2393bp- sense:  
260 GAACCAUUGUGGAUCAAAU/anti-sense: AUUUGAUCCACAAUGGUUC; (start on target  
261 sequence at CDS position 2403bp sense: GGAUCAAAUAAUUACGAA/anti-sense:  
262 UUUCGUAUUAAUUUGAUCC) diluted in 500 µl before mixing vigorously for 10 seconds at  
263 room temperature. Both duplex siRNAs corresponding to *BgPiwi* transcript were utilized  
264 simultaneously in a single tube. Samples of siRNA/PEI complexes (Total of 1.0 ml in  
265 microcentrifuge tubes) were incubated at room temperature for 20 minutes before placing  
266 individual juvenile snails in the mixtures. Holes were punched in lids of the closed  
267 microcentrifuge tubes containing snails in siRNA/PEI complexes before incubating overnight at  
268 room temperature. Control tubes, incubated in parallel, contained the following samples, a)  
269 *Bgpiwi* siRNAs without PEI, b) PEI only without *Bgpiwi* siRNAs and c) Mission Universal  
270 mock siRNA/PEI complexes (Sigma Millipore). RNA was isolated as described above from  
271 washed transfected snails before utilizing for qPCR as described above. For each assay,  
272 quantitative expressions of *Bgpiwi* and *nimbusRT* transcripts (normalized against myoglobin  
273 expression) were evaluated with and without *S. mansoni* infection by qPCR using forward and  
274 reverse primers corresponding to either transcript (Table 1). Transfected snails (with and  
275 without infection) that were not investigated by RNA-based assays were maintained in at 25°C  
276 as above and monitored for cercarial shedding at 4, 6, or 10 weeks later. The silencing of *Bgpiwi*

277 with dsRNA/PEI was evaluated in three, and with siRNA/PEI, in four biological replicates,  
278 respectively.

279

## 280 **Treatment of susceptible BBO2 snails with reverse transcriptase inhibitor,**

### 281 **lamivudine**

282 Given that the central role of PIWI involves silencing of endogenous mobile elements,  
283 such as nimbus, a non-LTR retrotransposon in the genome of *B. glabrata* [10, 35], we  
284 examined the modulation of expression of the transcript encoding the RT domain of  
285 *nimbus* in the following categories of susceptible BBO2 snails - a) normal snails, b)  
286 snails treated overnight at room temperature with lamivudine at 100 ng/ml (Sigma  
287 Aldrich, St. Louis, MO) and c) BS90 resistant snails treated with siRNA corresponding to  
288 *Bgpiwi*/PEI complexes, as described above. Snails in these categories (a to c) were either  
289 unexposed (0) or exposed (individually) to 10 miracidia for 2 hours at 25°C. Before  
290 exposure, individual snails incubated in either lamivudine or *Bgpiwi* siRNA/PEI  
291 complexes were washed twice with water before transfer to 2.0 ml water in 6-well tissue  
292 culture plates to which freshly hatched miracidia (isolated from 7 weeks infected mouse  
293 liver homogenate) was added and maintained for 120 min at room temperature. Exposed  
294 and unexposed snails from either lamivudine-treated susceptible BBO2 or BS90  
295 *siRNABgPiwi*/PEI- treated snails were either frozen immediately at -80°C in RNazol  
296 until required for RNA isolation or, if not used for RNA preparation immediately,  
297 transferred into 500 ml beakers containing aerated tap water and maintained as described  
298 above at room temperature and evaluated for cercarial shedding at week 4, 6 or 10 post-  
299 exposure. For comparison, susceptible snails were also either pre-treated as described

300 above, or after two weeks post-exposure, with another RT inhibitor BPPA (Santa Cruz  
301 Biotechnology Inc., CA) that specifically inhibits the catalytic RT domain of human  
302 telomerase (hTERT).

303

304 **Examining genome organization, relocation of the *piwi* locus, in susceptible and**  
305 **resistant snails following exposure to *S. mansoni* miracidia**

306 Fluorescence *in situ* hybridisation (FISH) was performed using a probe derived from *B.*  
307 *glabrata* bacterial artificial chromosome (BAC) libraries for the *piwi* locus. The DNA  
308 probe was labelled by nick translation (BioNick Invitrogen, UK) as described [36, 37]  
309 and incubating for 45-50 mins. The probe was precipitated with 1 µg of labelled BAC  
310 DNA[36], 80 µg of *B. glabrata* genomic DNA and 9 µg of herring sperm DNA. These  
311 components were dissolved in 48 µL of hybridisation mix at room temperature overnight,  
312 this amount can be used for up to four slides. Preparation and fixation of samples  
313 followed the protocol described previously [19]. Snail shells were crushed using a  
314 microscope slide and the ovotestes excised using needle-nose forceps. Each ovotestis  
315 was placed in a microcentrifuge tube containing 0.05 M KCl, macerated using a tissue  
316 grinder (Axygen, UK) and incubated in solution for 30 min at room temperature.

317 Samples were then centrifuged at 200g for 5 min and supernatant discarded.

318 Methanol:acetic acid [3:1, v/v] was presented dropwise, with agitation, to the samples.

319 Once 0.5 mL of fixative was added, the samples were incubated at room temperature for  
320 10 min before centrifuging again and discarding the supernatant, this fixation step was

321 repeated twice with the final fix volume being 100 µL. Slides were also prepared by

322 misting the slide with water vapour and then dropping 20 µL of a sample from a height

323 onto the slide and allowing the slide to dry on a slide drier. The slides were aged by  
324 placing into a 70°C oven for 60 min then were taken through a dehydration series of 70%,  
325 90% and 100% ethanol, spending 5 min in each solution. Slides were dried and warmed  
326 up to 37°C on a slide dryer alongside 22x22 coverslips in preparation for probe addition.  
327 Probe denaturation was performed at 75°C for 5 min and then allowed to reanneal for 20  
328 min at 37°C before use. Hybridisation of samples and probe was performed using the  
329 Top Brite automatic slide hybridiser (Resnova, Italy). Eleven µL of probe was presented  
330 to a coverslip and the slide with the sample brought to the coverslip and the coverslip  
331 sealed to the slide using rubber cement (Weldtite). The Top Brite was set for 37°C for 2  
332 min up to 75°C for 2 min and then lowered to 37°C for 30 min, once the slides had  
333 returned to 37°C they were transferred to a humidified chamber at 37°C for 72 hours.  
334 Post hybridisation, the rubber cement was removed and coverslips allowed to detach in  
335 the first wash. The washes were performed at 42°C in 2x SSC three times for 5 min each.  
336 A blocking solution, made of 4% BSA (Sigma Aldrich, UK) in 2x SSC, was prepared.  
337 After slides were removed from the third wash the excess solution was drained and 100  
338 µL of blocking solution was added and the slides covered with parafilm. Slides were  
339 maintained in a humidified chamber at room temperature for 30 min. Streptavidin-Cy3  
340 was diluted 1:200 in 1% BSA in 2x SSC. After the blocking solution was removed, 100  
341 µL of streptavidin-Cy3 solution was placed on each slide, covered in parafilm and  
342 incubated in a humidified chamber at 37°C for 30 min. After the streptavidin-Cy3  
343 incubation the slides were washed sequentially in 2x SSC for 5 min, 1x PBS + 0.1%  
344 Tween 20 (Sigma Aldrich) for 1 min, and 1x PBS for 1 min. Lastly, the slides were

345 rinsed in sterile water before counterstaining with 4',6-diamidino-2-phenylindole (DAPI)  
346 in mountant (H1200, Vectorshield).

347

### 348 **Image Analysis**

349 Images of nuclei were captured either with an Olympus BX41 fluorescence microscope  
350 with a greyscale digital camera (Digital Scientific, UK) and the Smart Capture 3 software  
351 (Digital Scientific, UK) or a Leica DM4000 using a Leica DFC365 FC camera and the  
352 Leica Application Suite (LAS) imaging software. At least 50 nuclei were imaged for  
353 each condition and processed via erosion script analysis [38] [39] to assess gene loci  
354 positioning by using greyscale images and measuring the intensity of DAPI and  
355 fluorescence in situ hybridization (FISH) signal, using the DAPI to outline the nuclei to  
356 create five shells of equal area so that the intensity of the DAPI and FISH signal can be  
357 measured and the FISH signal normalised for position by dividing by the DAPI signal,  
358 averaged for the 50 images. Unpaired, equal variance, Student's *t* tests were performed  
359 to ascertain significant differences in gene loci positioning within the different shells.

360

## 361 **RESULTS**

362

363 **Transcripts encoding PIWI (*BgPiwi*), HDAC (*BgHDAC*), chromobox protein**  
364 **homolog 1 (*BgCBx1*), histone acetyl transferase (*BgHAT*) and metallotransferase**  
365 **(*BgMT*) are differentially regulated in resistant BS90 and susceptible BBO2 snails**

366 In order to confirm and validate results of differential expression (DE) obtained from the De-  
367 novo single-pass sequencing



368 of RNA isolated from *S. mansoni* exposed juvenile BS90 F<sub>2</sub> snails, which were cultured  
369 either at non-permissive (25°C), or permissive (32°C), temperatures. We investigated the  
370 expression of selected transcripts that have a role in epigenetics by two-step qRT-PCR  
371 performed with RNA isolated from several different individual juvenile *B. glabrata* snails  
372 that were either resistant (BS90 cultured at 25°C) or susceptible (BBO2 and BS90  
373 cultured at 32°C) to *S. mansoni* infection. The investigation of temporal (0, 30 min, 1, 2,  
374 4, and 16 hours) expression of *BgPiwi* in either juvenile resistant BS90 (25°C) or juvenile  
375 susceptible BBO2 following exposure to *S. mansoni* by qPCR showed that the transcript  
376 encoding the *B. glabrata* Piwi-like protein (Isoform 1 Accession number XP\_013081375)  
377 was upregulated between 30 min and 2 hour (2- to 7-fold) post-exposure in the resistant  
378 BS90 but not in the susceptible BBO2 snail (Fig.1A). Figure 1B shows the temporal  
379 expression of the transcript encoding *BgHDAC* (Accession Xp\_0130754221.1). Results  
380 likewise showed upregulation of this transcript (1.8-fold) in the juvenile resistant BS90  
381 but not in the juvenile susceptible (BBO2) snails 2 hours after *S. mansoni* exposure.  
382 Similarly, as shown in Figures 1C to 1E, results demonstrated that transcripts encoding,  
383 the chromobox protein homolog 1 (Fig. 1C, *BgCBx1*), histone acetyl transferase (Fig. 1D,  
384 *BgHAT*) and metallotransferase (Fig. 1E, *BgMT*) were also upregulated in BS90 resistant  
385 but not the susceptible BBO2 snails, following *S. mansoni* infection. Inductions of up to  
386 13- and 10-fold for transcripts encoding the chromobox protein homolog 1 and MT,  
387 respectively (between 2 and 4 hours post exposure) were observed in exposed juvenile  
388 resistant BS90 but not their exposed juvenile BBO2 susceptible counterparts.  
389

390 **siRNA corresponding to *BgPiwi* knock down expression of the *piwi* encoding**  
391 **transcript rendering resistant BS90 snails susceptible**

392 Since the findings revealed that the transcript encoding *BgPiwi* was upregulated in  
393 juvenile resistant BS90 snails after *S. mansoni* infection, we proceeded to examine the  
394 modulation of this (*BgPiwi*) transcript in the resistant (25°C) and the susceptible juvenile  
395 (32°C) BS90 snails, with and without *S. mansoni* infection. The findings presented in  
396 Figure 2A demonstrate that unlike resistant BS90 snails, cultured at 25°C, where  
397 expression of the *BgPiwi* encoding was upregulated following (2 hour) *S. mansoni*  
398 infection; in susceptible juvenile BS90 snails, cultured at 32°C, the *piwi* transcript was  
399 downregulated, similarly to *S. mansoni* infection of the susceptible BBO2 snail (Fig. 1A).

400 Based on these data, and given the known role of PIWI in silencing endogenous  
401 retrotransposable elements and previous results that revealed expression (upregulation) of  
402 the RT domain of *nimbus* occurring in juvenile susceptible but not resistant snails in  
403 response to *S. mansoni*, the functional role of PIWI in the epigenetics of *B. glabrata/S.*  
404 *mansoni* susceptibility was investigated by silencing the expression of the transcript  
405 encoding *BgPiwi* by using corresponding siRNAs. As shown in Figure 2B, investigation  
406 of the expression of the transcript encoding *BgPiwi* in siRNA/PEI transfected snails with  
407 (2 hours) and without (0 hours) *S. mansoni* exposure showed the knock-down of the  
408 *BgPiwi* encoding transcript in snails transfected with siRNAs corresponding to *BgPiwi*,  
409 but not to the universal mock siRNA. Use of *Bgpiwi* dsRNA/PEI complexes instead of  
410 siRNA/PEI complexes to transfect BS90 snails, similarly, produced the knock-down of  
411 the *piwi* encoding transcript as observed with using siRNAs. To determine the biological  
412 effect of silencing *BgPiwi* in relation to *S. mansoni* infection in *BgPiwi* siRNA/PEI

413 transfected BS90 snails, schistosome exposed transfected non-transfected normal snails  
414 and Universal mock siRNA/PEI transfected snails were left at room temperature and  
415 evaluated at 4- and 6-weeks post-exposure. As shown in Figures 2C and 2D, BS90,  
416 normally resistant snails, transfected with *BgPiwi* siRNA/PEI, shed cercariae at 4- and 6-  
417 weeks post-exposure to *S. mansoni*.

418

419 **Knock-down of piwi encoding transcript with *siBgpiwi*/PEI complexes concurrently**  
420 **upregulates the *nimbus* RT in transfected BS90 snails**

421 Because PIWI suppresses the expression of retrotransposable elements, such as the *B.*  
422 *glabrata* non-LTR retrotransposable element *nimbus*, the transcription of the RT domain  
423 of this element was investigated in either unexposed control (0) or *S. mansoni* (2 hour)  
424 exposed BS90 snails that were transfected with either *Bgpiwi* siRNA or mock universal  
425 siRNA (Fig. 3A). The same cDNA templates utilized in the qPCR assays shown in Figure  
426 2B were utilized in the analysis of the expression of *nimbus* RT (Fig. 3A). Using gene  
427 specific primers corresponding to the RT domain of *nimbus* results showed that in normal  
428 BS90 snails that were unexposed (0) to *S. mansoni*, that similar to resistant BS90 that  
429 were transfected with mock siRNA (UnisiRNA/PEI) expression of *nimbus* RT remained  
430 low upon infection of the normal resistant BS90 snails as demonstrated previously [18].  
431 However, in BS90 snails transfected with *Bgpiwi* siRNA before exposure, the *nimbus* RT  
432 encoding transcript was upregulated when *Bgpiwi* transcript was silenced.

433

434 **Lamivudine RT inhibitor treatment of susceptible BBO2 snails differentially**  
435 **regulates transcription of *nimbus* RT and *Bgpiwi***

436 To further examine the interplay between the expression of *Bgpiwi* and *nimbus* RT  
437 encoding transcripts in relation to *S. mansoni* infection of *B. glabrata*. The susceptible  
438 juvenile BBO2 snail was treated with the RT inhibitor drug, lamivudine, as described in  
439 materials and methods prior to exposure to *S. mansoni*. As shown in Figure 4, panels A  
440 and B, qPCR analysis of the same cDNA template prepared from BBO2 susceptible  
441 snails that were either treated or untreated with different concentrations (100 ng/ml and  
442 200 ng/ml) of lamivudine before exposure (for 2 hours) or not exposed (0 hour) to *S.*  
443 *mansoni* were performed by utilizing primers corresponding to the *Bgpiwi* (4A) or  
444 *nimbus* RT (4B) encoding transcripts. Figure 4A shows the expression of *Bgpiwi*  
445 remained relatively unchanged with drug treatment while that of *nimbus* RT (Fig. 4B)  
446 was downregulated with Lamivudine. Both concentrations of lamivudine, either 100 or  
447 200 ng/ml, used to treat BBO2 snails prior to exposure knocked-down the expression of  
448 the *nimbus* RT encoding transcript in lamivudine-treated snails.

449

#### 450 **Lamivudine blocks schistosome infection of BBO2 snails**

451 Because the silencing of the *Bgpiwi* encoding transcript rendered the resistant BS90 snail  
452 susceptible, concurrent with the down- and up-regulation of the *Bgpiwi* encoding  
453 transcript and *nimbus* RT encoding transcripts, respectively, and since follow-up qPCR  
454 analysis using the same cDNA templates showed that *nimbus* RT was knocked down by  
455 lamivudine treatment of the susceptible BBO2 snail, the effect of this drug on the ability  
456 of the susceptible snail to sustain a viable infection was examined (Figure 5). As shown  
457 in Figure 5A, where juvenile BBO2 snails were either treated with 100 ng/ml of  
458 lamivudine either before or after two weeks exposure to *S. mansoni* miracidia, snails

459 failed to shed cercariae when treated with lamivudine prior to exposure (Fig. 5A).  
460 However, snails treated with BPPA (anthraquinone diacetate), another RT inhibitor that  
461 specifically blocks the reverse transcriptase activity of the human homolog of telomerase  
462 (hTERT) in *B. glabrata* shed cercariae when treated before exposure but not when treated  
463 at 14 days post parasite exposure (Fig. 5B) in contrast to the outcome when snails were  
464 treated with lamivudine before *S. mansoni* infection. Treatment of the snails with  
465 lamivudine at day 14 post-exposure, however, showed some snails shed cercariae when  
466 the drug was utilized later after infection.

467

#### 468 **Relocalization of the *piwi* gene locus occurs in resistant *B. glabrata* snails upon** 469 **infection**

470 We had demonstrated that co-culture of snail Bge cells with live parasite [34, 36], and  
471 infection of whole snails with live parasite, both lead to non-random gene loci relocation  
472 within the interphase nuclei of the host snail cells, correlated with gene up-regulation [13,  
473 19, 40], with notable differences in gene movement between susceptible and resistant  
474 snails. We have been able to demonstrate again that gene loci change their non-random  
475 nuclear location with changes in gene expression. A FISH probe containing the  
476 sequences for *B. glabrata piwi* was employed to delineate the nuclear position of the *piwi*  
477 gene loci in three snail strains, BS90 (resistant) and the two susceptible strains, BB02 and  
478 NMRI (Figure 6). The nuclear positioning of the gene loci were analyzed using the  
479 erosion analysis script for gene and chromosome positioning, we have used previously  
480 for different species[41-43] and can be assigned to a peripheral (Figure 6A), intermediate  
481 (Figure 6B) or internal (Figure 6C) location in cell nuclei. Notably, the *piwi* gene signal

482 is in different nuclear compartments for the resistant and susceptible snails. Indeed, in  
483 BS90 (Figure 6D), the gene loci are found towards the nuclear interior and upon infection  
484 there is a relocation towards the nuclear periphery at 30 minutes after infection (Figure  
485 6D), which coincides with the increase in *piwi* transcripts (Figure 1A). By two hours, the  
486 gene loci are relocating back to the nuclear interior (Figure 6D).

487  
488 The two susceptible snail strains of BB02 (Figure 6E) and NMRI (Figure 6F) display a  
489 similar gene loci location for *piwi*, an intermediate location, different from the resistant  
490 BS90 strain (Figure 7D). Furthermore, the *piwi* gene locus does not change location until  
491 4 hours post-infection, where in both snail strains, the gene locus is in the nuclear  
492 interior, a location has been correlated with down-regulation of expression in BS90, and  
493 in BB02 (Figure 1A). Together, these findings further support the notion that the parasite  
494 is able to influence genome behavior within its host for its own advantage in an  
495 epigenetic mechanism, through functional spatial positioning.

496

## 497 **DISCUSSION**

498 Significant progress has been made in recent years towards elucidating the molecular  
499 basis of *S. mansoni* resistance/susceptibility in the intermediate snail vector *B. glabrata*.  
500 From these studies, it has become clear that the snail and schistosome relationship is  
501 complex and highly variable [13, 20, 44]. This study was undertaken to determine the  
502 role of epigenetics in shaping the relationship between the snail and the schistosome. The  
503 genetics of this interaction is well known and several molecular determinants that  
504 underlie the innate defense anti-schistosome response in *B. glabrata* have been identified

505 as have sequences that are linked in the snail genome to resistance [14, 21, 45].

506 Epigenetics describes the inheritance of a reversible phenotype that is not influenced by

507 any change in the sequence of DNA. Transgenerational epigenetic inheritance induced by

508 environmental changes have recently reported the role of PIWI and small piRNA in

509 stress-induced genome modifications (see [46]). The impact of viral infection on the

510 siRNA and Argonaute /PIWI pathway has mainly been reported in insects[47, 48] .

511 However, little is known regarding genes and proteins involved in this insect Ago-

512 2/RNAi antiviral/stress defense response [49].

513

514 Variation in *B. glabrata* susceptibility to *S. mansoni* was investigated by examining the

515 regulation of key transcripts that play a role in epigenetics. Our approach was to use

516 representative juvenile snail stocks that are either resistant (BS90) or susceptible (BBO2)

517 to the NMRI strain of *S. mansoni*, to examine the temporal regulation of transcripts

518 encoding Piwi (*BgPiwi*), chromobox protein homolog 1 (*BgCBx1*), histone acetyl

519 transferase (HAT) histone deacetylase (HDAC) and metallotransferase (MT) were

520 examined in these snail stocks within 30 min to 16hr post- exposure to *S. mansoni*. The

521 differential expression of these transcripts was confirmed by comparing RNA-seq

522 datasets that were generated from non-permissive juvenile BS90 snails, cultured at room

523 temperature (25°C), and their permissive counterparts cultured for two generations at

524 32°C. The snail infections were carried out exclusively with juvenile snails. Thus, to

525 further validate the differential expression of these transcripts, resistant juvenile BS90

526 and susceptible juvenile BBO2 snails were exposed to *S. mansoni* before using real-time

527 qPCR to confirm their modulation pre- and post-parasite exposure. Transcripts encoding

528 PIWI (*BgPiwi*), chromobox protein homolog 1 (*BgCBx1*), histone acetyl transferase  
529 (HAT) histone deacetylase (HDAC) and metallotransferase (MT) were upregulated (1.8  
530 to 10-fold) in the resistant (BS90) snail as compared to their downregulation in the  
531 susceptible juvenile snail (BBO2). Upregulation of the majority of these transcripts  
532 occurred within the first 30 min of exposure to *S. mansoni*, peaking at 120 min before  
533 subsiding. In earlier reports, we showed that the regulation of the RT domain of the *B.*  
534 *glabrata* endogenous non-LTR-retrotransposable element, *nimbus*, was linked to the  
535 early differential stress response observed between juvenile resistant and susceptible  
536 snails [18]. Accordingly, induction of RT occurred concurrently with the upregulation of  
537 the transcript encoding Hsp70 in the susceptible but not the resistant snail to *S. mansoni*.  
538 Exposure of *B. glabrata* to irradiated attenuated miracidia, however, failed to induce  
539 these stress-related transcripts in early-infected juvenile susceptible snails [25]. Given  
540 those findings and those presented here showing that upregulation of the *BgPiwi*  
541 encoding transcript, occurs in resistant BS90 snails residing at room temperature (where  
542 they are resistant) but not in their susceptible counterparts residing at 32°C, we examined  
543 the expression of the *Bgpiwi* transcript more closely in relation to the early expression of  
544 *nimbus* in susceptible and resistant snails. To reiterate, changes in transcription regulation  
545 were evident within the 30 minutes of infection. In this regard, these novel findings differ  
546 from those described by others where molecular interactions between the snail and  
547 schistosomes were performed much later after miracidia penetration at which time the  
548 responses we now report might have waned.  
549



550 The existence of several piRNA sequences in *B. glabrata* has been described but their  
551 role in a piwi-piRNA mediated anti-parasite defense mechanism in the snail remains  
552 elusive [50]. However, to determine whether a piwi gene-silencing mechanism that  
553 involves *nimbus* RT plays a role in blocking transmission of schistosomes in *B. glabrata*,  
554 we utilized a previously developed PEI-mediated soaking method to deliver two different  
555 *BgPiwi* corresponding duplex siRNAs, simultaneously, into the resistant BS90 snail,  
556 thereby knocking-down the expression of the PIWI encoding transcript. The RNAi  
557 suppression of PIWI transcription, rendered these *Bgpiwi* siRNA/PEI transfected resistant  
558 BS90 snails susceptible and thus able to shed cercariae. While the transcript encoding  
559 *Bgpiwi* was reduced in siRNA/PEI transfected snails, in contrast, the expression of  
560 *nimbus* RT-encoding transcript was upregulated, indicating that a gene silencing  
561 mechanism mediated by the interplay of piwi and modulation of the transcription of  
562 *nimbus* RT plays a major role in *B. glabrata* susceptibility to *S. mansoni*. To provide  
563 further support for these findings, the susceptible BBO2 snail was treated with  
564 lamivudine, a known RT inhibitor. Lamivudine is a RT nucleoside analog inhibitor that is  
565 used to treat hepatitis B and HIV/ AIDS [51]. Treatment of either susceptible BBO2 or  
566 NMRI snails prior to schistosome exposure, consistently, after several biological  
567 replicates blocked *S. mansoni* infection in the snail. By contrast, BPPA, another RT  
568 inhibitor that specifically targets the RT activity of telomerase, did not block infection in  
569 *B. glabrata* by *S. mansoni* when snails were treated before parasite exposure. However,  
570 in snails treated at 2 weeks after exposure, BPPA prevented infection unlike what was  
571 observed with this treatment regimen with lamivudine. These findings indicated that the  
572 mechanism of action of this *nimbus*/PIWI interplay occurs very early in the *S. mansoni*

573 and *B. glabrata* interaction. In ongoing studies, we have shown that an hTERT homolog  
574 is absent in the *S. mansoni* genome with the snail ortholog showing significant identity at  
575 the amino acid level to the human enzyme.

576

577 Work is currently underway to determine if using the same siRNA mediated gene  
578 silencing strategy as described above will reveal the significance of the other transcripts  
579 identified in this study and their functional role in epigenetics of the *S. mansoni/B.*  
580 *glabrata* relationship. Previously, we showed that hypomethylation of the stress Hsp70  
581 protein locus precedes the early upregulation of the Hsp70 encoding transcript in *S.*  
582 *mansoni* exposed susceptible (NMRI) but not resistant (BS90) juvenile snails [52]. The  
583 findings here that the transcript encoding MT was upregulated in juvenile BS90 resistant  
584 but not susceptible BBO2 upon early parasite infection snails supports this earlier result  
585 [52]. Ideal follow up experiments to further verify the involvement of all the transcripts  
586 identified in this study in epigenetics of snail plasticity to *S. mansoni* susceptibility will  
587 be to edit their CDS by a permanent gene mutation such as by CRISPR/Cas9 to knockout  
588 their function. These approaches can likely contribute to deciphering epigenetic processes  
589 that underlie the susceptibility of the snail to the parasite. Toward this objective,  
590 molecular toolkits for gene editing in *B. glabrata* are being developed. CRISPR gene  
591 editing has been used to edit the allograft inflammatory factor gene in the *Bge* embryonic  
592 cell line from *B. glabrata* [53] and is finding utility in editing the schistosome genome  
593 [54] [55]. Confirming earlier findings, we show that in intact juvenile resistant and  
594 susceptible snails, within a short period post-exposure to *S. mansoni*, the non-random  
595 movement of the *piwi* locus within interphase nuclei in relation to its active transcription

596 depending on the susceptibility phenotype of the snail)[19]. We have shown for the  
597 schistosome mediated relocation of gene loci that movement in interphase nuclei (from  
598 peripheral to interior location) occurs early after infection of susceptible, not resistant  
599 snails, and precedes transcription of the gene loci in question. A soluble factor(s) within  
600 excretory secretory products (ESPs) from the wild type miracidium that mediates the  
601 systemic reorganization of the host genome is yet to be uncovered. Aside from  
602 schistosomes, viruses are the only other pathogens that have been shown to also mediate  
603 non-random gene relocation. However, schistosomes are the first metazoan parasites that  
604 have been shown to possess the ability to manipulate the genome of the host in this  
605 profound spatio-epigenetic fashion.

606

607 To conclude, although a molecular basis exists for *B. glabrata* susceptibility to *S.*  
608 *mansoni*, it remains far from clear what precise pathways/mechanisms are responsible for  
609 parasite survival or rejection in the early infected snail. This is the first study to show that  
610 epigenetics, involving the interplay of PIWI and the endogenous non LTR-  
611 retrotransposable *nimbus*, plays a role in the plasticity of snail susceptibility to *S.*  
612 *mansoni*.

613

#### 614 **ACKNOWLEDGEMENTS**

615 This work was supported in part by funds from the Clement B.T. Knight Cancer  
616 foundation and a grant from the National Science Foundation Grant (Award No.  
617 1622811). Travel awards to master's students (O.A, S.B, and N.P) from the UDC  
618 foundation is also acknowledged. We thank Ms. Oumsilama Elhelu for her technical help

619 and Dr. April Massey for her help and support in allowing Dr. Michael Smith to conduct  
620 his research for his Ph.D. dissertation at UDC. DH was partially supported by funds from  
621 the College of Health, Medicine and Life Sciences at Brunel University London.

622

## 623 **Figure Legends**

### 624 **Figure 1A**

625 qPCR analysis of RNA from resistant BS-90 (blue histogram) or susceptible BBO2 (gray  
626 histograms) juvenile snails unexposed (0) or exposed for increasing intervals (30 seconds to 16  
627 hours) to *S. mansoni* miracidia. Histograms show expression of the *BgPiwi* encoding transcript in  
628 snails at each time point from five biological replicates. Note the increase in fold change in the  
629 resistant BS-90 compared to the susceptible BBO2 snails after parasite infection. Significant  
630 expression normalized against expression of the myoglobin encoding transcript was measured by  
631 2-way ANOVA and is indicated by number of asterixis on each histogram where \*\*\*\*, indicates  
632 the most significant value  $p \leq 0.0001$ , \*\*\*  $p \leq 0.001$ , \*\*  $p \leq 0.01$ , \*  $p \leq 0.05$ , ns  $p > 0.05$ .

633

### 634 **Figure 1B**

635 qPCR analysis of RNA from either resistant BS-90 (blue histogram) or susceptible BBO2 (gray  
636 histograms) juvenile snails unexposed (0) or exposed for increasing intervals (30 seconds to 16  
637 hours) to *S. mansoni* miracidia. Histograms show expression of the *BgHDAC* encoding transcript  
638 in snails at each time point from five biological replicates. Note the increase in fold change in the  
639 resistant BS-90 compared to the susceptible BBO2 snails after parasite infection. Significant  
640 expression normalized against expression of the myoglobin encoding transcript was measured by

641 2-way ANOVA and is indicated by number of asterixis on each histogram where \*\*\*\*, indicates  
642 the most significant value  $p \leq 0.0001$ , \*\*\*  $p \leq 0.001$ , \*\*  $p \leq 0.01$ , \*  $p \leq 0.05$ , ns  $p > 0.05$ .

643

#### 644 **Figure 1C**

645 qPCR analysis of RNA from either resistant BS-90 (blue histogram) or susceptible BBO2 (gray  
646 histograms) juvenile snails unexposed (0) or exposed for increasing intervals (30 seconds to 16  
647 hours) *S. mansoni* miracidia. Histograms show expression of the *BgCBx* encoding transcript in  
648 snails at each time point from five biological replicates. Note the increase in fold change in the  
649 resistant BS-90 compared to the susceptible BBO2 snails after parasite infection. Significant  
650 expression normalized against expression of the myoglobin encoding transcript was measured by  
651 2-way ANOVA and is indicated by number of asterixis on each histogram where \*\*\*\*, indicates  
652 the most significant value  $p \leq 0.0001$ , \*\*\*  $p \leq 0.001$ , \*\*  $p \leq 0.01$ , \*  $p \leq 0.05$ , ns  $p > 0.05$ .

653

#### 654 **Figure 1D**

655 qPCR analysis of RNA from either resistant BS-90 (blue histogram) or susceptible BBO2 (gray  
656 histograms) juvenile snails unexposed (0) or exposed for increasing intervals (30 seconds to 16  
657 hours) to *S. mansoni* miracidia. Histograms show expression of the *BgHAT* encoding transcript  
658 in snails at each time point from five biological replicates. Note the increase in fold change in the  
659 resistant BS-90 compared to the susceptible BBO2 snails after parasite infection. Significant  
660 expression normalized against expression of the myoglobin encoding transcript was measured by  
661 2-way ANOVA and is indicated by number of asterixis on each histogram where \*\*\*\*, indicates  
662 the most significant value  $p \leq 0.0001$ , \*\*\*  $p \leq 0.001$ , \*\*  $p \leq 0.01$ , \*  $p \leq 0.05$ , ns  $p > 0.05$ .

663

664 **Figure 1E**

665 qPCR analysis of RNA from either resistant BS-90 (blue histogram) or susceptible BBO2 (gray  
666 histograms) juvenile snails unexposed (0) or exposed for increasing intervals (30 seconds to 16  
667 hours) to *S. mansoni* miracidia. Histograms show expression of the *BgMT* encoding transcript in  
668 snails at each time point from five biological replicates. Note the increase in fold change in the  
669 resistant BS-90 compared to the susceptible BBO2 snails after parasite infection. Significant  
670 expression normalized against expression of the myoglobin encoding transcript was measured by  
671 2-way ANOVA and is indicated by number of asterixis on each histogram where \*\*\*\*, indicates  
672 the most significant value  $p \leq 0.0001$ , \*\*\*  $p \leq 0.001$ , \*\*  $p \leq 0.01$ , \*  $p \leq 0.05$ , ns  $p > 0.05$ .

673

674 **Figure 2A**

675 qPCR analysis of RNA from either non permissive (25°C) resistant BS-90 (blue histogram) or  
676 permissive (32°C) susceptible BS-90 (gray histograms) juvenile snails unexposed (normal) or  
677 exposed for 2hr to *S. mansoni* miracidia. Histograms show expression of the *BgPiwi* encoding  
678 transcript in these snails residing at different temperatures. Note the significant induction (8-fold  
679 change) in 25°C non-permissive BS-90 snails compared the down regulation of the transcript in  
680 permissive BS-90 snails residing at 32°C after parasite infection. Fold change was determined as  
681 described in materials and methods. Significant expression normalized against expression of the  
682 myoglobin encoding transcript was measured by 2-way ANOVA and is indicated by number of  
683 asterixis on each histogram where \*\*\*\*, indicates the most significant value  $p \leq 0.0001$ , \*\*\*  $p \leq$   
684  $0.001$ , \*\*  $p \leq 0.01$ , \*  $p \leq 0.05$ , ns  $p > 0.05$ .

685

686 **Figure 2B**

687 qPCR analysis of RNA from resistant BS-90 juvenile snails unexposed (gray) or exposed (blue)  
688 for 2hr to *S. mansoni* miracidia. Histograms show expression of the *BgPiwi* encoding transcript  
689 in normal BS-90 snails (control) or those transfected with *BgPiwi* siRNA. Note induction of the  
690 *BgPiwi* encoding transcript occurs in *S. mansoni* exposed control BS-90 snails and the knock  
691 down of the transcript in BS-90 (exposed and unexposed) snails transfected with *BgPiwi* siRNA.  
692 In BS-90 snails transfected with mock UNIsiRNA, note the upregulation of the *BgPiwi* encoding  
693 transcript in exposed snails similar to induction observed in control exposed snails. Fold change  
694 was determined as described in materials and methods. Significant expression normalized against  
695 expression of the myoglobin encoding transcript was measured by 2-way ANOVA and is  
696 indicated by number of asterixis on each histogram where \*\*\*\*\*, indicates the most significant  
697 value  $p \leq 0.0001$ , \*\*\*  $p \leq 0.001$ , \*\*  $p \leq 0.01$ , \*  $p \leq 0.05$ , ns  $p > 0.05$ .

698

### 699 **Figure 2C**

700 To determine the biological effect of silencing *BgPiwi* in relation to *S. mansoni* infection  
701 in *BgPiwi* siRNA/PEI transfected BS-90 snails, schistosome exposed *BgPiwi* siRNA  
702 transfected and non-transfected (not shown) snails were left at room temperature and  
703 evaluated at 4- and 6- weeks post- exposure. Note that the BS-90 snail transfected with  
704 *BgPiwi* siRNA shed cercariae at 4- and 6- weeks post- exposure to *S. mansoni*.

705

### 706 **Figure 3**

707 qPCR analysis of RNA from resistant BS-90 juvenile snails unexposed (gray) or exposed (blue)  
708 for 2hr to *S. mansoni* miracidia. Histograms show expression of the *nimbusRT* encoding  
709 transcript in normal BS-90 snails (control) or those transfected with *BgPiwi* siRNA. Note the

710 down regulation of the *nimbusRT* encoding transcript in *S. mansoni* exposed control BS-90 snails  
711 and the upregulation of *nimbusRT* transcript in BS-90 (exposed and unexposed) snails  
712 transfected with *BgPiwi* siRNA where transcript encoding *BgPiwi* has been knocked-down  
713 (shown in Fig.2B). In BS-90 snails transfected with mock UNIsiRNA, note the down regulation  
714 of the *nimbusRT* encoding transcript in exposed snails similar to that observed in control exposed  
715 snails. Fold change was determined as described in materials and methods. Significant  
716 expression normalized against expression of the myoglobin encoding transcript was measured by  
717 2-way ANOVA and is indicated by number of asterixis on each histogram where \*\*\*\*, indicates  
718 the most significant value  $p \leq 0.0001$ , \*\*\*  $p \leq 0.001$ , \*\*  $p \leq 0.01$ , \*  $p \leq 0.05$ , ns  $p > 0.05$ .

719

720

#### 721 **Figure 4A**

722 qPCR analysis of RNA from susceptible BBO2 juvenile snails unexposed (gray) or exposed  
723 (blue) for 2hr to *S. mansoni* miracidia. Histograms show expression of the *BgPiwi* encoding  
724 transcript in normal BBO2 snails (0) or those treated with RT inhibitor Lamivudine (100 ng/ml  
725 or 200ng/ml). Note the down regulation of the *BgPiwi* encoding transcript in exposed control (0)  
726 snails and lamivudine treated snails (exposed and unexposed) snails. Fold change was  
727 determined as described in materials and methods. Significant expression normalized against  
728 expression of the myoglobin encoding transcript was measured by 2-way ANOVA and is  
729 indicated by number of asterixis on each histogram where \*\*\*\*, indicates the most significant  
730 value  $p \leq 0.0001$ , \*\*\*  $p \leq 0.001$ , \*\*  $p \leq 0.01$ , \*  $p \leq 0.05$ , ns  $p > 0.05$ .

731

#### 732 **Figure 4B**



733 qPCR analysis of RNA from susceptible BBO2 juvenile snails unexposed (gray) or exposed  
734 (blue) for 2hr to *S. mansoni* miracidia. Histograms show expression of the *nimbusRT* encoding  
735 transcript in normal BBO2 snails (0) or those treated with RT inhibitor Lamivudine (100 ng/ml  
736 or 200ng/ml). Note the upregulation of the *nimbusRT* encoding transcript in exposed control (0)  
737 snails and down regulation of this transcript in Lamivudine treated snails (exposed and  
738 unexposed) snails. Fold change was determined as described in materials and methods.  
739 Significant expression normalized against expression of the myoglobin encoding transcript was  
740 measured by 2-way ANOVA and is indicated by number of asterixis on each histogram where  
741 \*\*\*\*, indicates the most significant value  $p \leq 0.0001$ , \*\*\*  $p \leq 0.001$ , \*\*  $p \leq 0.01$ , \*  $p \leq 0.05$ , ns  $p$   
742  $> 0.05$ .

743

#### 744 **Figure 5A**

745 To determine the effect of lamivudine in relation to *S. mansoni* infection of susceptible  
746 BBO2 snails, snails were treated before exposure with 100 ng/ml of the RT inhibitor,  
747 maintained at room temperature, and evaluated for up to 6 weeks post-exposure. Note  
748 that the BBO2 snails treated before infection with lamivudine failed to shed cercariae at 6  
749 weeks post-exposure to *S. mansoni* unlike in untreated (control) snails. Also note that  
750 BBO2 snails treated with the hTERT RT inhibitor BBPA before exposure, unlike  
751 Lamivudine shed cercariae at 6 weeks post-exposure.

#### 752 **Figure 5B**

753 The effect of treating BBO2 susceptible snails with 100 ng/ml of lamivudine at 14 days  
754 post -exposure to *S. mansoni* was compared to the effect of treating susceptible BBO2  
755 snails before exposure with 100 ng/ml of BPPA as described in materials and methods

756 and left at room temperature and evaluated for up to 6 weeks post- exposure. Note that  
757 the BBO2 snails treated before *S. mansoni* exposure with 100 ng BPPA failed to shed  
758 cercariae at 6- weeks post- exposure unlike in untreated (control) snails. Also note that  
759 BBO2 snails treated with lamivudine at 14 days after infection shed cercariae at 6 weeks  
760 post-exposure.

761

## 762 **Figure 6**

763 Nuclei (blue) were isolated from snail strains BS90, BB02 and NIMR ovo-testis and  
764 subjected to 2D-fluorescence in situ hybridisation (FISH) with labelled probes for the  
765 transposable element, *piwi* (green). Scale bar = 5  $\mu$ m. Using a bespoke nuclear  
766 positioning script that creates five concentric shells of equal area, shells 1-5, with shell 1  
767 being the nuclear periphery and shell 5 the nuclear centre, the percentage of fluorescent  
768 green gene signal is measured in each shell for over 50 nuclei and divided by the  
769 percentage of blue fluorescent signal for the DNA content (DAPI) in each shell. The data  
770 are averaged and plotted as bar charts with standard error of the mean (SEM).

771

772

773

774

775

776

777

778

779

780

781

782

783

784

785

786

787 **References**

- 788
- 789 1. Colley DG, Bustinduy AL, Secor WE, King CH. Human schistosomiasis. *Lancet*.  
790 2014;383(9936):2253-64. Epub 2014/04/05. doi: 10.1016/S0140-6736(13)61949-2. PubMed  
791 PMID: 24698483; PubMed Central PMCID: PMC4672382.
  - 792 2. Hotez PJ, Engels D, Gyapong M, Ducker C, Malecela MN. Female Genital  
793 Schistosomiasis. *N Engl J Med*. 2019;381(26):2493-5. Epub 2019/12/28. doi:  
794 10.1056/NEJMp1914709. PubMed PMID: 31881137.
  - 795 3. Colley DG. Morbidity control of schistosomiasis by mass drug administration: how can  
796 we do it best and what will it take to move on to elimination? *Trop Med Health*. 2014;42(2  
797 Suppl):25-32. Epub 2014/11/27. doi: 10.2149/tmh.2014-S04. PubMed PMID: 25425948;  
798 PubMed Central PMCID: PMC4204048.
  - 799 4. Knopp S, Ame SM, Hattendorf J, Ali SM, Khamis IS, Bakar F, et al. Urogenital  
800 schistosomiasis elimination in Zanzibar: accuracy of urine filtration and haematuria reagent  
801 strips for diagnosing light intensity *Schistosoma haematobium* infections. *Parasit Vectors*.  
802 2018;11(1):552. Epub 2018/10/26. doi: 10.1186/s13071-018-3136-6. PubMed PMID: 30352631;  
803 PubMed Central PMCID: PMC6199745.
  - 804 5. Shen Y, Wiegand RE, Olsen A, King CH, Kittur N, Binder S, et al. Five-Year Impact of  
805 Different Multi-Year Mass Drug Administration Strategies on Childhood *Schistosoma mansoni*-  
806 Associated Morbidity: A Combined Analysis from the Schistosomiasis Consortium for  
807 Operational Research and Evaluation Cohort Studies in the Lake Victoria Regions of Kenya and  
808 Tanzania. *Am J Trop Med Hyg*. 2019;101(6):1336-44. Epub 2019/08/14. doi: 10.4269/ajtmh.19-  
809 0273. PubMed PMID: 31407653; PubMed Central PMCID: PMC6896894.
  - 810 6. Kittur N, King CH, Campbell CH, Kinung'hi S, Mwinzi PNM, Karanja DMS, et al.  
811 Persistent Hotspots in Schistosomiasis Consortium for Operational Research and Evaluation  
812 Studies for Gaining and Sustaining Control of Schistosomiasis after Four Years of Mass Drug  
813 Administration of Praziquantel. *Am J Trop Med Hyg*. 2019;101(3):617-27. Epub 2019/07/10.  
814 doi: 10.4269/ajtmh.19-0193. PubMed PMID: 31287046; PubMed Central PMCID:  
815 PMC6726953.
  - 816 7. Boissier J, Grech-Angelini S, Webster BL, Allienne JF, Huyse T, Mas-Coma S, et al.  
817 Outbreak of urogenital schistosomiasis in Corsica (France): an epidemiological case study.  
818 *Lancet Infect Dis*. 2016;16(8):971-9. Epub 2016/05/21. doi: 10.1016/S1473-3099(16)00175-4.  
819 PubMed PMID: 27197551.
  - 820 8. Mulero S, Rey O, Arancibia N, Mas-Coma S, Boissier J. Persistent establishment of a  
821 tropical disease in Europe: the preadaptation of schistosomes to overwinter. *Parasit Vectors*.  
822 2019;12(1):379. Epub 2019/07/31. doi: 10.1186/s13071-019-3635-0. PubMed PMID: 31358021;  
823 PubMed Central PMCID: PMC6664521.
  - 824 9. Oleaga A, Rey O, Polack B, Grech-Angelini S, Quilichini Y, Perez-Sanchez R, et al.  
825 Epidemiological surveillance of schistosomiasis outbreak in Corsica (France): Are animal  
826 reservoir hosts implicated in local transmission? *PLoS Negl Trop Dis*. 2019;13(6):e0007543.  
827 Epub 2019/06/25. doi: 10.1371/journal.pntd.0007543. PubMed PMID: 31233502; PubMed  
828 Central PMCID: PMC6611637.
  - 829 10. Adema CM, Hillier LW, Jones CS, Loker ES, Knight M, Minx P, et al. Whole genome  
830 analysis of a schistosomiasis-transmitting freshwater snail. *Nat Commun*. 2017;8:15451. Epub  
831 2017/05/17. doi: 10.1038/ncomms15451. PubMed PMID: 28508897; PubMed Central PMCID:  
832 PMC665440852.

- 833 11. El-Sayed NM, Bartholomeu D, Ivens A, Johnston DA, LoVerde PT. Advances in  
834 schistosome genomics. *Trends Parasitol.* 2004;20(4):154-7. Epub 2004/04/22. doi:  
835 10.1016/j.pt.2004.02.002. PubMed PMID: 15099549.
- 836 12. Collins FS, Morgan M, Patrinos A. The Human Genome Project: lessons from large-scale  
837 biology. *Science.* 2003;300(5617):286-90. Epub 2003/04/12. doi: 10.1126/science.1084564.  
838 PubMed PMID: 12690187.
- 839 13. Mitta G, Gourbal B, Grunau C, Knight M, Bridger JM, Theron A. The Compatibility  
840 Between *Biomphalaria glabrata* Snails and *Schistosoma mansoni*: An Increasingly Complex  
841 Puzzle. *Adv Parasitol.* 2017;97:111-45. Epub 2017/03/23. doi: 10.1016/bs.apar.2016.08.006.  
842 PubMed PMID: 28325369.
- 843 14. Allan ER, Tennessen JA, Bollmann SR, Hanington PC, Bayne CJ, Blouin MS.  
844 Schistosome infectivity in the snail, *Biomphalaria glabrata*, is partially dependent on the  
845 expression of *Grcm6*, a Guadeloupe Resistance Complex protein. *PLoS Negl Trop Dis.*  
846 2017;11(2):e0005362. Epub 2017/02/06. doi: 10.1371/journal.pntd.0005362. PubMed PMID:  
847 28158185; PubMed Central PMCID: PMC5310918.
- 848 15. Castillo MG, Humphries JE, Mourao MM, Marquez J, Gonzalez A, Montelongo CE.  
849 *Biomphalaria glabrata* immunity: Post-genome advances. *Dev Comp Immunol.*  
850 2020;104:103557. Epub 2019/11/25. doi: 10.1016/j.dci.2019.103557. PubMed PMID: 31759924.
- 851 16. Coustau C, Gourbal B, Duval D, Yoshino TP, Adema CM, Mitta G. Advances in  
852 gastropod immunity from the study of the interaction between the snail *Biomphalaria glabrata*  
853 and its parasites: A review of research progress over the last decade. *Fish Shellfish Immunol.*  
854 2015;46(1):5-16. Epub 2015/02/11. doi: 10.1016/j.fsi.2015.01.036. PubMed PMID: 25662712.
- 855 17. Dinguirard N, Cavalcanti MGS, Wu XJ, Bickham-Wright U, Sabat G, Yoshino TP.  
856 Proteomic Analysis of *Biomphalaria glabrata* Hemocytes During *in vitro* Encapsulation of  
857 *Schistosoma mansoni* Sporocysts. *Front Immunol.* 2018;9:2773. Epub 2018/12/18. doi:  
858 10.3389/fimmu.2018.02773. PubMed PMID: 30555466; PubMed Central PMCID:  
859 PMC6281880.
- 860 18. Ittiprasert W, Nene R, Miller A, Raghavan N, Lewis F, Hodgson J, et al. *Schistosoma*  
861 *mansoni* infection of juvenile *Biomphalaria glabrata* induces a differential stress response  
862 between resistant and susceptible snails. *Exp Parasitol.* 2009;123(3):203-11. Epub 2009/08/08.  
863 doi: 10.1016/j.exppara.2009.07.015. PubMed PMID: 19660454; PubMed Central PMCID:  
864 PMC2760455.
- 865 19. Arican-Goktas HD, Ittiprasert W, Bridger JM, Knight M. Differential spatial  
866 repositioning of activated genes in *Biomphalaria glabrata* snails infected with *Schistosoma*  
867 *mansoni*. *PLoS Negl Trop Dis.* 2014;8(9):e3013. Epub 2014/09/12. doi:  
868 10.1371/journal.pntd.0003013. PubMed PMID: 25211244; PubMed Central PMCID:  
869 PMC4161332.
- 870 20. Knight M, Elhelu O, Smith M, Haugen B, Miller A, Raghavan N, et al. Susceptibility of  
871 Snails to Infection with Schistosomes is influenced by Temperature and Expression of Heat  
872 Shock Proteins. *Epidemiology (Sunnyvale).* 2015;5(2). Epub 2015/10/28. doi: 10.4172/2161-  
873 1165.1000189. PubMed PMID: 26504668; PubMed Central PMCID: PMC4618387.
- 874 21. Allan ERO, Bollmann S, Peremyslova E, Blouin M. Neither heat pulse, nor  
875 multigenerational exposure to a modest increase in water temperature, alters the susceptibility of  
876 Guadeloupean *Biomphalaria glabrata* to *Schistosoma mansoni* infection. *PeerJ.* 2020;8:e9059.  
877 Epub 2020/05/01. doi: 10.7717/peerj.9059. PubMed PMID: 32351792; PubMed Central PMCID:  
878 PMC7183749.

- 879 22. Sullivan J, Banoub M, Tellechea N. Neonatal Susceptibility to Infection with  
880 *Schistosoma Mansoni* in Resistant *Biomphalaria Glabrata*. *J Parasitol*. 2020. Epub 2020/04/01.  
881 doi: 10.1645/19-144. PubMed PMID: 32227217.
- 882 23. Richards CS, Shade PC. The genetic variation of compatibility in *Biomphalaria glabrata*  
883 and *Schistosoma mansoni*. *J Parasitol*. 1987;73(6):1146-51. Epub 1987/12/01. PubMed PMID:  
884 3437352.
- 885 24. Richards CS, Minchella DJ. Transient non-susceptibility to *Schistosoma mansoni*  
886 associated with atrial amoebocytic accumulations in the snail host *Biomphalaria glabrata*.  
887 *Parasitology*. 1987;95 ( Pt 3):499-505. Epub 1987/12/01. doi: 10.1017/s0031182000057929.  
888 PubMed PMID: 3696776.
- 889 25. Ittiprasert W, Knight M. Reversing the resistance phenotype of the *Biomphalaria glabrata*  
890 snail host *Schistosoma mansoni* infection by temperature modulation. *PLoS Pathog*.  
891 2012;8(4):e1002677. Epub 2012/05/12. doi: 10.1371/journal.ppat.1002677. PubMed PMID:  
892 22577362; PubMed Central PMCID: PMC3343117.
- 893 26. Newton WL. The establishment of a strain of *Australorbis glabratus* which combines  
894 albinism and high susceptibility to infection with *Schistosoma mansoni*. *J Parasitol*.  
895 1955;41(5):526-8. Epub 1955/10/01. PubMed PMID: 13264025.
- 896 27. Lewis FA, Stirewalt MA, Souza CP, Gazzinelli G. Large-scale laboratory maintenance of  
897 *Schistosoma mansoni*, with observations on three schistosome/snail host combinations. *J*  
898 *Parasitol*. 1986;72(6):813-29. Epub 1986/12/01. PubMed PMID: 3546654.
- 899 28. Cousin C, Ofori K, Acholonu S, Miller A, Richards C, Lewis F, et al. *Schistosoma*  
900 *mansoni*: changes in the albumen gland of *Biomphalaria glabrata* snails selected for  
901 nonsusceptibility to the parasite. *J Parasitol*. 1995;81(6):905-11. Epub 1995/12/01. PubMed  
902 PMID: 8544062.
- 903 29. Standen OD. Some observations upon the maintenance of *Australorbis glabratus* in the  
904 laboratory. *Ann Trop Med Parasitol*. 1951;45(1):80-3. Epub 1951/05/01. doi:  
905 10.1080/00034983.1951.11685473. PubMed PMID: 24540880.
- 906 30. Tucker MS, Lewis FA, Driver JD, Granath WO, Jr. Determination and quantification of  
907 *Schistosoma mansoni* cercarial emergence from *Biomphalaria glabrata* snails. *J Parasitol*.  
908 2014;100(6):778-83. Epub 2014/07/16. doi: 10.1645/14-531.1. PubMed PMID: 25019357.
- 909 31. Ittiprasert W, Miller A, Myers J, Nene V, El-Sayed NM, Knight M. Identification of  
910 immediate response genes dominantly expressed in juvenile resistant and susceptible  
911 *Biomphalaria glabrata* snails upon exposure to *Schistosoma mansoni*. *Mol Biochem Parasitol*.  
912 2010;169(1):27-39. Epub 2009/10/10. doi: 10.1016/j.molbiopara.2009.09.009. PubMed PMID:  
913 19815034; PubMed Central PMCID: PMC3343114.
- 914 32. Livak KJ, Schmittgen TD. Analysis of relative gene expression data using real-time  
915 quantitative PCR and the 2(-Delta Delta C(T)) Method. *Methods*. 2001;25(4):402-8. Epub  
916 2002/02/16. doi: 10.1006/meth.2001.1262. PubMed PMID: 11846609.
- 917 33. Knight M, Miller A, Liu Y, Scaria P, Woodle M, Ittiprasert W. Polyethyleneimine (PEI)  
918 mediated siRNA gene silencing in the *Schistosoma mansoni* snail host, *Biomphalaria glabrata*.  
919 *PLoS Negl Trop Dis*. 2011;5(7):e1212. Epub 2011/07/19. doi: 10.1371/journal.pntd.0001212.  
920 PubMed PMID: 21765961; PubMed Central PMCID: PMC3134429.
- 921 34. Knight M, Ittiprasert W, Odoemelam EC, Adema CM, Miller A, Raghavan N, et al. Non-  
922 random organization of the *Biomphalaria glabrata* genome in interphase Bge cells and the spatial  
923 repositioning of activated genes in cells co-cultured with *Schistosoma mansoni*. *Int J Parasitol*.

- 924 2011;41(1):61-70. Epub 2010/09/21. doi: 10.1016/j.ijpara.2010.07.015. PubMed PMID:  
925 20849859; PubMed Central PMCID: PMCPMC3081665.
- 926 35. Raghavan N, Knight M. The snail (*Biomphalaria glabrata*) genome project. Trends  
927 Parasitol. 2006;22(4):148-51. Epub 2006/02/25. doi: 10.1016/j.pt.2006.02.008. PubMed PMID:  
928 16497557.
- 929 36. Odoemelam E, Raghavan N, Miller A, Bridger JM, Knight M. Revised karyotyping and  
930 gene mapping of the *Biomphalaria glabrata* embryonic (Bge) cell line. Int J Parasitol.  
931 2009;39(6):675-81. Epub 2009/01/10. doi: 10.1016/j.ijpara.2008.11.011. PubMed PMID:  
932 19133265; PubMed Central PMCID: PMCPMC2656398.
- 933 37. Odoemelam EC, Raghavan N, Ittiprasert W, Miller A, Bridger JM, Knight M. FISH on  
934 chromosomes derived from the snail model organism *Biomphalaria glabrata*. Methods Mol Biol.  
935 2010;659:379-88. Epub 2010/09/03. doi: 10.1007/978-1-60761-789-1\_29. PubMed PMID:  
936 20809328.
- 937 38. Clements MO, Godfrey A, Crossley J, Wilson SJ, Takeuchi Y, Boshoff C. Lentiviral  
938 manipulation of gene expression in human adult and embryonic stem cells. Tissue Eng.  
939 2006;12(7):1741-51. Epub 2006/08/08. doi: 10.1089/ten.2006.12.1741. PubMed PMID:  
940 16889505.
- 941 39. Croft JA, Bridger JM, Boyle S, Perry P, Teague P, Bickmore WA. Differences in the  
942 localization and morphology of chromosomes in the human nucleus. J Cell Biol.  
943 1999;145(6):1119-31. Epub 1999/06/15. doi: 10.1083/jcb.145.6.1119. PubMed PMID:  
944 10366586; PubMed Central PMCID: PMCPMC2133153.
- 945 40. Knight M, Ittiprasert W, Arican-Goktas HD, Bridger JM. Epigenetic modulation, stress  
946 and plasticity in susceptibility of the snail host, *Biomphalaria glabrata*, to *Schistosoma mansoni*  
947 infection. Int J Parasitol. 2016;46(7):389-94. Epub 2016/04/09. doi:  
948 10.1016/j.ijpara.2016.03.003. PubMed PMID: 27056272.
- 949 41. Meaburn KJ, Newbold RF, Bridger JM. Positioning of human chromosomes in murine  
950 cell hybrids according to synteny. Chromosoma. 2008;117(6):579-91. Epub 2008/07/25. doi:  
951 10.1007/s00412-008-0175-3. PubMed PMID: 18651158.
- 952 42. Clements CS, Bikkul U, Ahmed MH, Foster HA, Godwin LS, Bridger JM. Visualizing  
953 the Spatial Relationship of the Genome with the Nuclear Envelope Using Fluorescence In Situ  
954 Hybridization. Methods Mol Biol. 2016;1411:387-406. Epub 2016/05/06. doi: 10.1007/978-1-  
955 4939-3530-7\_24. PubMed PMID: 27147055.
- 956 43. Foster HA, Griffin DK, Bridger JM. Interphase chromosome positioning in in vitro  
957 porcine cells and ex vivo porcine tissues. BMC Cell Biol. 2012;13:30. Epub 2012/11/16. doi:  
958 10.1186/1471-2121-13-30. PubMed PMID: 23151271; PubMed Central PMCID:  
959 PMCPMC3499214.
- 960 44. Pila EA, Li H, Hambrook JR, Wu X, Hanington PC. Schistosomiasis from a Snail's  
961 Perspective: Advances in Snail Immunity. Trends Parasitol. 2017;33(11):845-57. Epub  
962 2017/08/15. doi: 10.1016/j.pt.2017.07.006. PubMed PMID: 28803793.
- 963 45. Ittiprasert W, Miller A, Su XZ, Mu J, Bhusudsawang G, Ukoskit K, et al. Identification  
964 and characterisation of functional expressed sequence tags-derived simple sequence repeat  
965 (eSSR) markers for genetic linkage mapping of *Schistosoma mansoni* juvenile resistance and  
966 susceptibility loci in *Biomphalaria glabrata*. Int J Parasitol. 2013;43(8):669-77. Epub 2013/05/07.  
967 doi: 10.1016/j.ijpara.2013.03.007. PubMed PMID: 23643514; PubMed Central PMCID:  
968 PMCPMC4038333.

- 969 46. Casier K, Boivin A, Carre C, Teyssset L. Environmentally-Induced Transgenerational  
970 Epigenetic Inheritance: Implication of PIWI Interacting RNAs. *Cells*. 2019;8(9). Epub  
971 2019/09/25. doi: 10.3390/cells8091108. PubMed PMID: 31546882; PubMed Central PMCID:  
972 PMCPMC6770481.
- 973 47. Ozata DM, Gainetdinov I, Zoch A, O'Carroll D, Zamore PD. PIWI-interacting RNAs:  
974 small RNAs with big functions. *Nat Rev Genet*. 2019;20(2):89-108. Epub 2018/11/18. doi:  
975 10.1038/s41576-018-0073-3. PubMed PMID: 30446728.
- 976 48. Kolliopoulou A, Santos D, Taning CNT, Wynant N, Vanden Broeck J, Smagghe G, et al.  
977 PIWI pathway against viruses in insects. *Wiley Interdiscip Rev RNA*. 2019;10(6):e1555. Epub  
978 2019/06/12. doi: 10.1002/wrna.1555. PubMed PMID: 31183996.
- 979 49. Torri A, Mongelli V, Mondotte JA, Saleh MC. Viral Infection and Stress Affect Protein  
980 Levels of Dicer 2 and Argonaute 2 in *Drosophila melanogaster*. *Front Immunol*. 2020;11:362.  
981 Epub 2020/03/21. doi: 10.3389/fimmu.2020.00362. PubMed PMID: 32194567; PubMed Central  
982 PMCID: PMCPMC7065269.
- 983 50. Queiroz FR, Portilho LG, Jeremias WJ, Baba EH, do Amaral LR, Silva LM, et al. Deep  
984 sequencing of small RNAs reveals the repertoire of miRNAs and piRNAs in *Biomphalaria*  
985 *glabrata*. *Mem Inst Oswaldo Cruz*. 2020;115:e190498. Epub 2020/07/02. doi: 10.1590/0074-  
986 02760190498. PubMed PMID: 32609280; PubMed Central PMCID: PMCPMC7328434.
- 987 51. Quercia R, Perno CF, Koteff J, Moore K, McCoig C, St Clair M, et al. Twenty-Five  
988 Years of Lamivudine: Current and Future Use for the Treatment of HIV-1 Infection. *J Acquir*  
989 *Immune Defic Syndr*. 2018;78(2):125-35. Epub 2018/02/24. doi:  
990 10.1097/QAI.0000000000001660. PubMed PMID: 29474268; PubMed Central PMCID:  
991 PMCPMC5959256.
- 992 52. Ittiprasert W, Miller, A., Knight, M., Tucker, M., & Hsieh, M. H. . Evaluation of cytosine  
993 DNA methylation of the *Biomphalaria glabrata* at shock protein 70 locus after biological and  
994 physiological stresses. *Journal of Parasitology and Vector Biology*. 2015;7(10):182-93.
- 995 53. Coelho FS, Rodpai R, Miller A, Karinshak SE, Mann VH, Dos Santos Carvalho O, et al.  
996 Diminished adherence of *Biomphalaria glabrata* embryonic cell line to sporocysts of  
997 *Schistosoma mansoni* following programmed knockout of the allograft inflammatory factor.  
998 *Parasit Vectors*. 2020;13(1):511. Epub 2020/10/15. doi: 10.1186/s13071-020-04384-9. PubMed  
999 PMID: 33050923; PubMed Central PMCID: PMCPMC7552541.
- 1000 54. Sankaranarayanan G, Coghlan A, Driguez P, Lotkowska ME, Sanders M, Holroyd N, et  
1001 al. Large CRISPR-Cas-induced deletions in the oxamniquine resistance locus of the human  
1002 parasite *Schistosoma mansoni*. *Wellcome Open Res*. 2020;5:178. Epub 2020/08/14. doi:  
1003 10.12688/wellcomeopenres.16031.1. PubMed PMID: 32789192; PubMed Central PMCID:  
1004 PMCPMC7405262.
- 1005 55. Ittiprasert W, Mann VH, Karinshak SE, Coghlan A, Rinaldi G, Sankaranarayanan G, et  
1006 al. Programmed genome editing of the omega-1 ribonuclease of the blood fluke, *Schistosoma*  
1007 *mansoni*. *Elife*. 2019;8. Epub 2019/01/16. doi: 10.7554/eLife.41337. PubMed PMID: 30644357;  
1008 PubMed Central PMCID: PMCPMC6355194.
- 1009  
1010

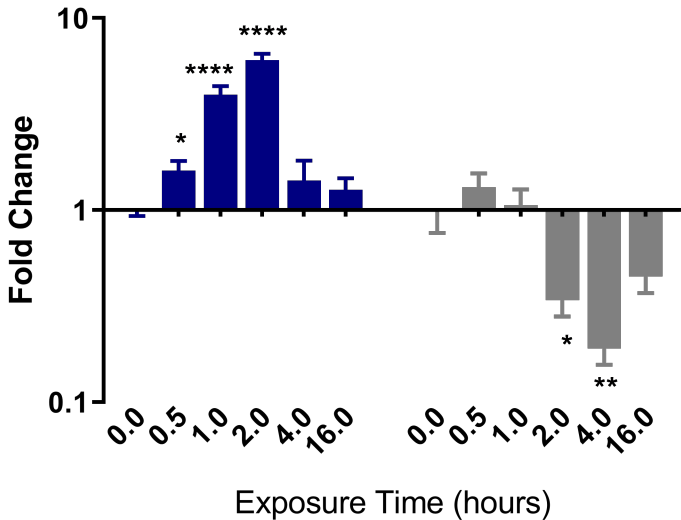



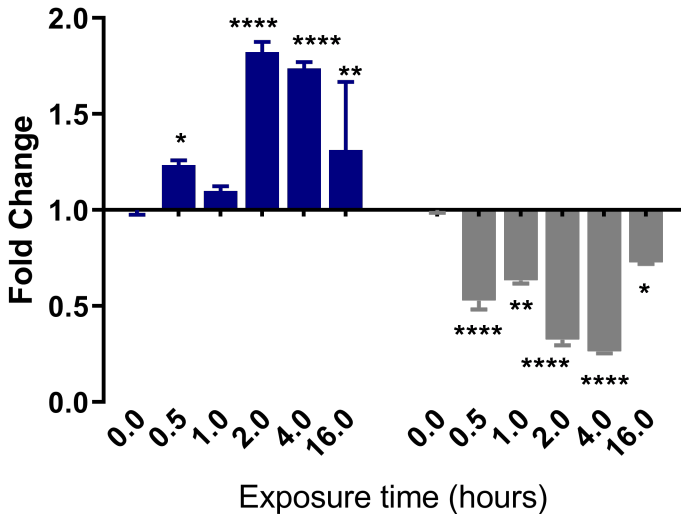

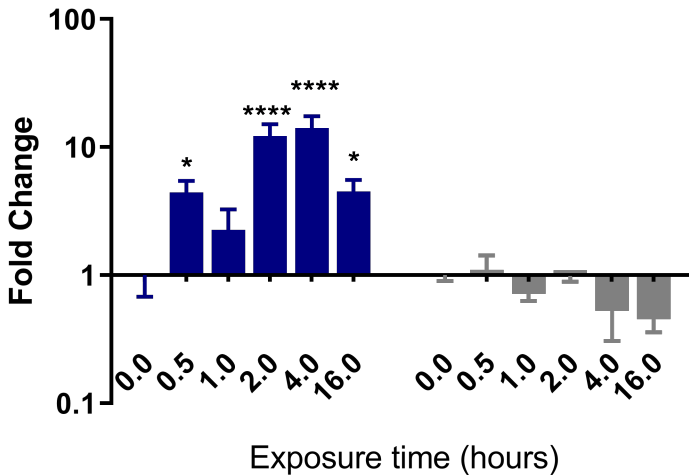

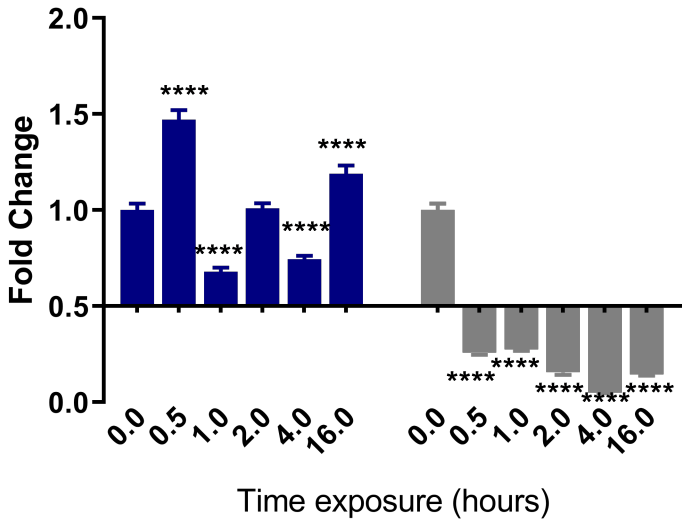

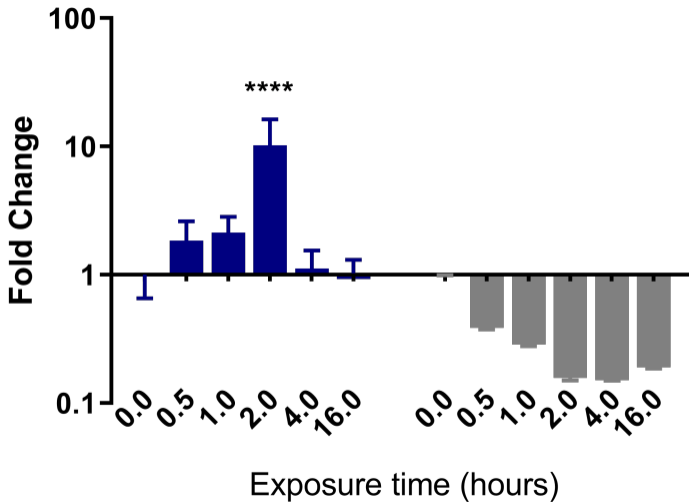

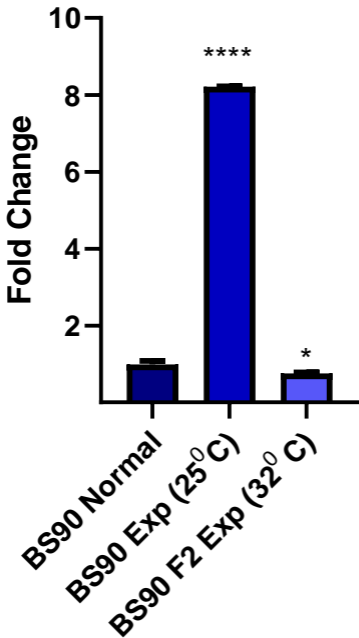

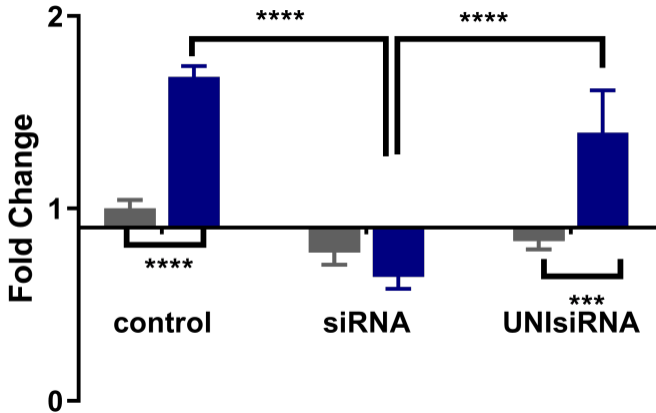

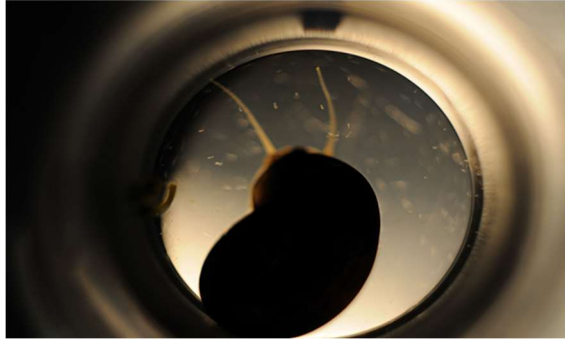

BS-90 PIWI/siRNA 4 weeks

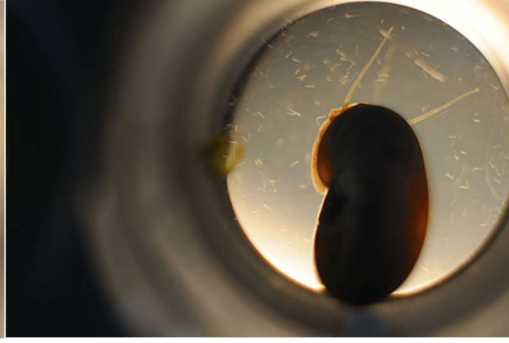

BS-90 PIWI/siRNA 6 weeks

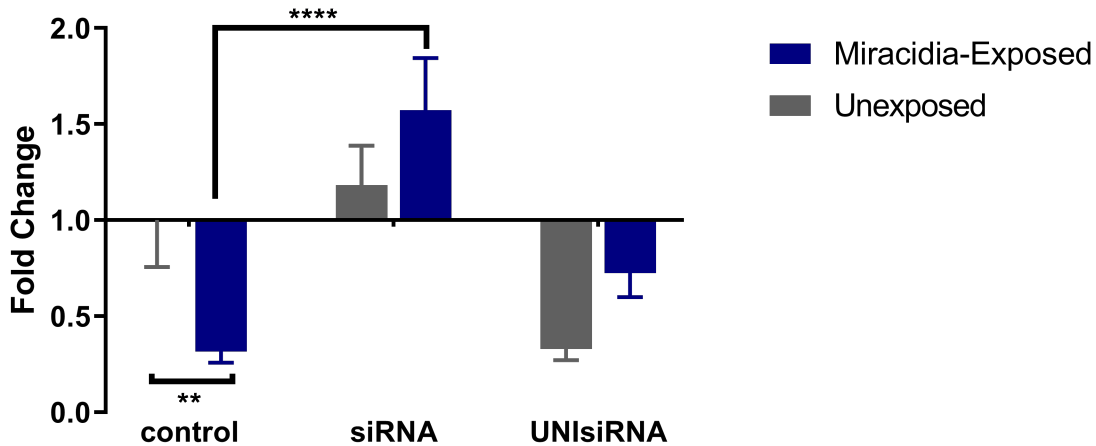



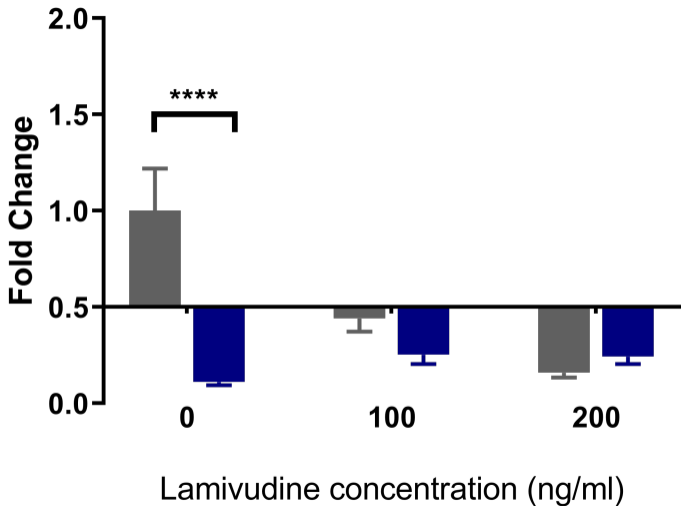

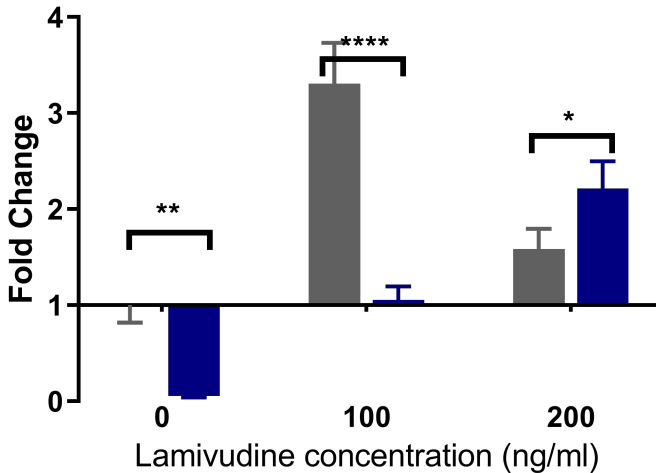

5A

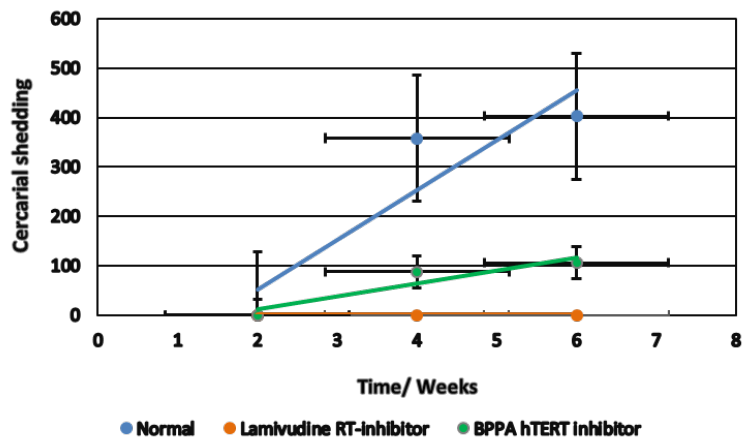

5B

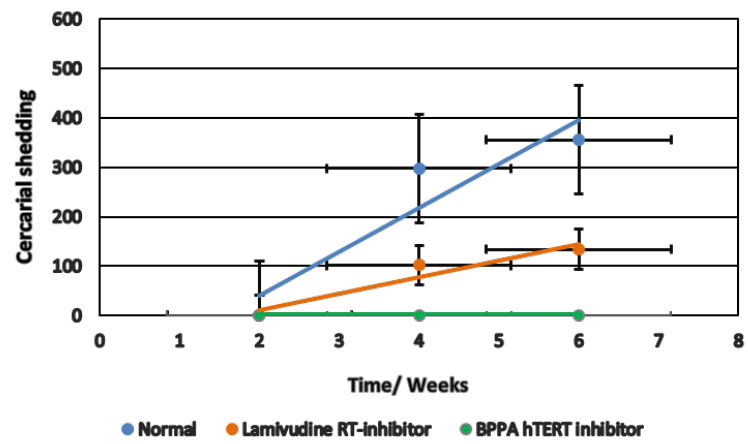

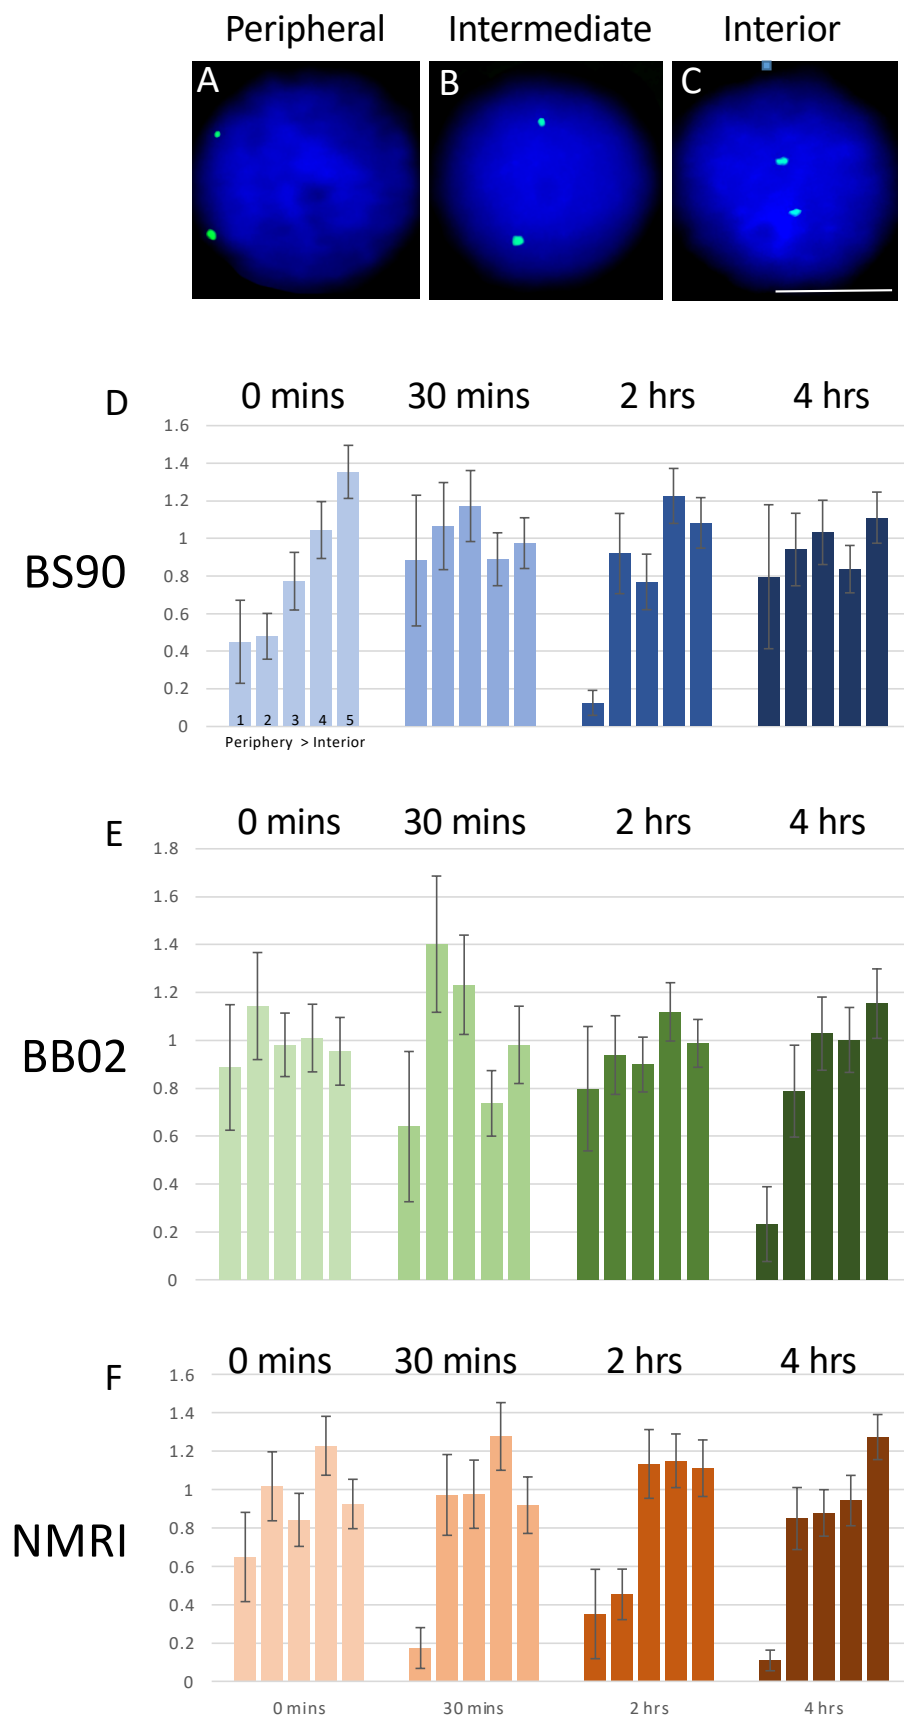

Source: https://www.biorxiv.org/content/10.1101/2021.01.12.426235v1.full.pdf
